# Supplementary material for: Exploring contextual factors influencing the implementation of evidence-based care for hypertension in Rwanda: a cross-sectional study using the COACH questionnaire
Source: PubMed Central journal article supplement — BMJ Open. 2021 Sep 21;11(9):e048425. doi: 10.1136/bmjopen-2020-048425 (PMC8458329; doi:10.1136/bmjopen-2020-048425), 2021-09-21
Supplement: bmjopen-2020-048425.draft_revisions.pdf [file bmjopen-2020-048425.draft_revisions.pdf]

# BMJ Open

BMJ Open is committed to open peer review. As part of this commitment we make the peer review history of every article we publish publicly available.

When an article is published we post the peer reviewers' comments and the authors' responses online. We also post the versions of the paper that were used during peer review. These are the versions that the peer review comments apply to.

The versions of the paper that follow are the versions that were submitted during the peer review process. They are not the versions of record or the final published versions. They should not be cited or distributed as the published version of this manuscript.

BMJ Open is an open access journal and the full, final, typeset and author-corrected version of record of the manuscript is available on our site with no access controls, subscription charges or pay-per-view fees (<http://bmjopen.bmj.com>).

If you have any questions on BMJ Open's open peer review process please email [info.bmjopen@bmj.com](mailto:info.bmjopen@bmj.com)

# BMJ Open

## Exploring contextual factors influencing the implementation of evidence-based care for hypertension in Rwanda: A cross-sectional study using the COACH questionnaire

|                               |                                                                                                                                                                                                                                                                                                                                                                                                                                                                                                                                                                                                                                                                                                                                                                                                                                                                                                                                                                                                                                           |
|-------------------------------|-------------------------------------------------------------------------------------------------------------------------------------------------------------------------------------------------------------------------------------------------------------------------------------------------------------------------------------------------------------------------------------------------------------------------------------------------------------------------------------------------------------------------------------------------------------------------------------------------------------------------------------------------------------------------------------------------------------------------------------------------------------------------------------------------------------------------------------------------------------------------------------------------------------------------------------------------------------------------------------------------------------------------------------------|
| Journal:                      | <i>BMJ Open</i>                                                                                                                                                                                                                                                                                                                                                                                                                                                                                                                                                                                                                                                                                                                                                                                                                                                                                                                                                                                                                           |
| Manuscript ID                 | bmjopen-2020-048425                                                                                                                                                                                                                                                                                                                                                                                                                                                                                                                                                                                                                                                                                                                                                                                                                                                                                                                                                                                                                       |
| Article Type:                 | Original research                                                                                                                                                                                                                                                                                                                                                                                                                                                                                                                                                                                                                                                                                                                                                                                                                                                                                                                                                                                                                         |
| Date Submitted by the Author: | 01-Jan-2021                                                                                                                                                                                                                                                                                                                                                                                                                                                                                                                                                                                                                                                                                                                                                                                                                                                                                                                                                                                                                               |
| Complete List of Authors:     | Baumann, Ana; Washington University in Saint Louis, Hooley, Cole; Brigham Young University<br>Goss, Charles W.; Washington University in St Louis<br>Mutabazi, Vincent; Regional Alliance for Sustainable Development<br>Brown, Angela L.; Washington University in St Louis School of Medicine<br>Schechtman, K; Washington University, Division of Biostatistics<br>Twagirumukiza, Marc; Regional Alliance for Sustainable Development; University of Rwanda<br>de las Fuentes, Lisa ; Washington University in Saint Louis<br>Reeds, Dominic; Washington University in St Louis School of Medicine<br>Williams, Makeda; National Heart Lung and Blood Institute<br>Mutimura, Eugene; Women's Equity in Access to Care and Treatment, Research and Professional Training<br>Bergström, Anna; Uppsala Universitet<br>Nishimwe, Aurore; Regional Alliance for Sustainable Development<br>Ingabire, Cecile; Regional Alliance for Sustainable Development<br>Davila-Roman, Victor G.; Washington University in St Louis School of Medicine |
| Keywords:                     | Hypertension < CARDIOLOGY, EDUCATION & TRAINING (see Medical Education & Training), Quality in health care < HEALTH SERVICES ADMINISTRATION & MANAGEMENT                                                                                                                                                                                                                                                                                                                                                                                                                                                                                                                                                                                                                                                                                                                                                                                                                                                                                  |
|                               |                                                                                                                                                                                                                                                                                                                                                                                                                                                                                                                                                                                                                                                                                                                                                                                                                                                                                                                                                                                                                                           |

SCHOLARONE™  
Manuscripts

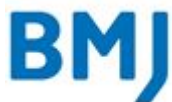

I, the Submitting Author has the right to grant and does grant on behalf of all authors of the Work (as defined in the below author licence), an exclusive licence and/or a non-exclusive licence for contributions from authors who are: i) UK Crown employees; ii) where BMJ has agreed a CC-BY licence shall apply, and/or iii) in accordance with the terms applicable for US Federal Government officers or employees acting as part of their official duties; on a worldwide, perpetual, irrevocable, royalty-free basis to BMJ Publishing Group Ltd ("BMJ") its licensees and where the relevant Journal is co-owned by BMJ to the co-owners of the Journal, to publish the Work in this journal and any other BMJ products and to exploit all rights, as set out in our [licence](#).

The Submitting Author accepts and understands that any supply made under these terms is made by BMJ to the Submitting Author unless you are acting as an employee on behalf of your employer or a postgraduate student of an affiliated institution which is paying any applicable article publishing charge ("APC") for Open Access articles. Where the Submitting Author wishes to make the Work available on an Open Access basis (and intends to pay the relevant APC), the terms of reuse of such Open Access shall be governed by a Creative Commons licence – details of these licences and which [Creative Commons](#) licence will apply to this Work are set out in our licence referred to above.

Other than as permitted in any relevant BMJ Author's Self Archiving Policies, I confirm this Work has not been accepted for publication elsewhere, is not being considered for publication elsewhere and does not duplicate material already published. I confirm all authors consent to publication of this Work and authorise the granting of this licence.

**Title:** Exploring contextual factors influencing the implementation of evidence-based care for hypertension in Rwanda: A cross-sectional study using the COACH questionnaire

Ana A. Baumann<sup>1</sup>,  
Cole Hooley<sup>2</sup>,  
Charles W. Goss<sup>3</sup>,  
Vincent Mutabazi<sup>4</sup>,  
Angela L. Brown<sup>5</sup>,  
Kenneth Schechtman<sup>3</sup>,  
Marc Twagirumukiza<sup>4,6</sup>,  
Lisa de las Fuentes<sup>5</sup>,  
Dominic Reeds<sup>5</sup>,  
Makeda Williams<sup>7</sup>,  
Eugene Mutimura<sup>4</sup>,  
Anna Bergström<sup>8</sup>,  
Aurore Nishimwe<sup>4</sup>,  
Cecile Ingabire<sup>4</sup>,  
Victor G. Davila-Roman<sup>5</sup>

1. Washington University in St. Louis, Brown School of Social Work, St. Louis, MO, USA
2. Brigham Young University, Provo, UT, USA
3. Washington University in St. Louis, Division of Biostatistics, St. Louis, MO, USA
4. Regional Alliance for Sustainable Development, Rwanda
5. Washington University in St. Louis, School of Medicine, Cardiovascular Division
6. College of Medicine and Health Sciences, University of Rwanda, Kigali, Rwanda
7. National Heart, Lung, and Blood Institute, Bethesda, MD, USA
8. Uppsala Global Health Research on Implementation and Sustainability (UGHRIS), Dept of Women's and Children's Health, Uppsala University, Sweden

Address for correspondence:

Victor G. Davila-Roman, MD  
Professor of Medicine, Anesthesiology and Radiology  
Director, Cardiovascular Imaging and Clinical Research Core Laboratory  
Cardiovascular Division, Box 8086  
Washington University School of Medicine  
660 S. Euclid Ave.  
St. Louis, MO 63110  
Email: [vdavila@wustl.edu](mailto:vdavila@wustl.edu)

**Disclaimer:** The views expressed in this manuscript are those of the authors and do not necessarily represent the views of the National Heart, Lung, and Blood Institute; the National Institutes of Health; or the U.S. Department of Health and Human Services.

## Abstract

**Importance:** Hypertension is the largest contributor to the Global Burden of Disease. In Rwanda, as in most low- and middle-income countries, an increasing prevalence of hypertension and its associated morbidity and mortality is causing major health care and increasing economic impact. Understanding healthcare systems context in hypertension care is necessary to address these gaps.

**Objective:** To study the hypertension healthcare context as perceived by healthcare providers using the Context Assessment for Community Health (COACH) tool to assesses modifiable aspects of the healthcare context that influence implementation of evidence-base care.

**Design:** A cross-sectional cohort responded to the COACH questionnaire.

**Setting:** Three tertiary care hospitals in Rwanda.

**Participants:** Healthcare professionals (n=223).

**Primary Outcome(s) and Measure(s):** The COACH tool consists of 49 items with eight subscales: Resources, Community Engagement, Commitment to Work, Informal Payment, Leadership, Work Culture, Monitoring Services for Action (5-point Likert scale) and Sources of Knowledge (on a 0-1 scale).

**Results:** Responders (n=223, 75% women; 56% aged 20-35 years) included 64% nurses (64%), midwives, primary care physicians and specialists. The subscales Commitment to Work, Leadership, Work Culture and Informal Payment scored between 4.7 and 4.1, the Community Engagement, Monitoring Services for Action and Organizational Resources scored 3 - $\leq$ 3.5. Sources of Knowledge had a mean score of 0.6 $\pm$ 0.3. While most reported having attended a didactic hypertension seminar, only 28% had received long-term training, and 51% had <3 years experience working with hypertension care delivery. Most indicated a need for additional training in hypertension care.

1  
2  
3 **Conclusions:** There is a need for increased and continuous training in Rwanda. Healthcare  
4 responders stated a commitment to work and reported supportive leadership while acknowledging  
5 challenges with resources and systems to support improvement for quality of care. COACH tool  
6 provides contextual guidance for development of training strategies prior to implementation of a  
7 sustainable hypertension care program in Rwanda.  
8  
9  
10  
11  
12  
13  
14  
15  
16

17 **Key words:** Hypertension, Rwanda, contextual assessment, guidelines, education and training  
18  
19  
20  
21

### 22 **Strengths and Limitations of the Study:**

- 23  
24 • A cross-sectional cohort of providers from three hospitals in Rwanda responded to the  
25 Context Assessment for Community Health (COACH) tool and a survey examining  
26 existing trainings in hypertension care.  
27  
28
- 29 • Respondents shared a high commitment to work and positive leadership, while indicating  
30 need for more training in hypertension care and monitoring.  
31  
32
- 33 • Based on the COACH tool training, strategies are being co-developed to implement a  
34 comprehensive and sustainable hypertension care program in Rwanda.  
35  
36  
37  
38  
39  
40  
41

42 **Funding statement:** This work was supported in part by NHLBI grants U24HL136790,  
43 D43TW10335, 3U01HL133994 and UL1TR00234.  
44  
45  
46  
47  
48  
49  
50  
51  
52  
53  
54  
55  
56  
57  
58  
59  
60

## Background

Hypertension, defined as high systolic blood pressure, is the most common disease in the world and the largest contributor to the Global Burden of Disease, affecting over 1.2 billion people worldwide. Hypertension is the most prevalent risk factor for the development of cardiovascular disease (CVD).<sup>1</sup> The overall global prevalence of hypertension exceeds 50% of adults older than 50 years, and in low- and middle-income countries (LMICs) ranges from 32%-78%.<sup>2-4</sup> Rwanda, located in sub-Saharan Africa, is a LMIC with 12.4 million relatively young people (those <34 years of age represent 78% of the population), and with a high population density.<sup>5,6</sup> Rwanda is undergoing an epidemiological transition with an increasing co-existence of infectious diseases and non-communicable diseases (NCDs) such as hypertension.<sup>6,7</sup> Epidemiologic data from Rwanda estimates a high prevalence of both hypertension and CVD, which together account for 36% of deaths.<sup>8</sup> The 2015 Rwanda NCDs risk survey based on the World Health Organization (WHO) STEPS framework (STEPwise Approach to Surveillance) reported an overall hypertension prevalence of 15% (95% confidence interval [CI]: 13.8 to 16.3) for those aged 15 to 64 years and 39% (95% CI: 35.7 to 43.1) for those aged 55–64 years, with deaths attributable to hypertension at 18/100,000.<sup>9</sup> These data are consistent with those of other sub-Saharan countries, reflecting the importance of hypertension as a public health burden in Sub-Saharan Africa.<sup>10</sup>

While evidence-based intervention (EBI) studies have shown that treatment and control of hypertension decreases morbidity and mortality, barriers for the implementation of these interventions have been found at all healthcare levels, including systems, providers, and patients.<sup>11</sup>

The application of dissemination and implementation (D&I) science allows for a rigorous and systematic approach to develop implementation strategies and improve the uptake of effective EBIs for hypertension care.<sup>12</sup>

1  
2  
3 Selection of implementation strategies, that is, methods to implement these EBI in usual care,  
4 should be based on frameworks and on an understanding of the context where the intervention will  
5 be implemented.<sup>13</sup> The Promoting Action on Research Implementation in Health Services  
6 (PARIHS) is a framework that outlines three core elements (evidence, context and facilitation) for  
7 successful EBI implementation. Context, defined as “the environment or setting in which the  
8 proposed change is to be implemented” is comprised of three sub-elements: culture, leadership  
9 and evaluation, dimensions being evaluated in this study.<sup>14-15</sup> The Context Assessment for  
10 Community Health (COACH), a validated theory-based tool aimed at examining healthcare  
11 contexts in LMICs, is a 49-item survey based on the context dimension of the PARIHS framework  
12 and the interconnected building blocks of the World Health Organization.<sup>15</sup> The COACH tool was  
13 developed to identify barriers for EBI implementation, to guide planning and adaptation of the  
14 strategies to increase the uptake of the EBIs, and to link contextual characteristics to outcome  
15 indicators of healthcare interventions.<sup>15</sup> Due to its theoretical base and its acceptable reliability  
16 and validity among providers in LMICs including Vietnam, Bangladesh, Uganda, South Africa,  
17 and Nicaragua<sup>15,16</sup>, COACH was used in the present study to examine the context of hypertension  
18 care in three hospitals in Rwanda as reported by healthcare providers.

## 39 **Methods**

40  
41  
42 **Study setting.** The study was conducted at three hospitals (district or provincial) in Rwanda; to  
43 maintain the confidentiality of participants, the hospitals are identified as A, B and C. The study  
44 was approved by the University of Rwanda CMHS Institutional Review Board and by the  
45 Washington University School of Medicine Institutional Review Board Committee.

46  
47  
48 **Participants.** Participants were healthcare providers working in the included hospitals. Lists of all  
49 medical professional staff (nursing, midwife, physicians) were provided by the hospital



1  
2  
3 administrations to the study team; from these lists, study participants were contacted to participate  
4  
5 in the study. All those who were contacted agreed to participate, all signed informed consent, and  
6  
7 subsequently underwent in-person interviews to complete the survey.  
8  
9

10 **Questions about provider training in hypertension.** Health care providers were asked four  
11  
12 questions regarding training in hypertension care: i) have you received didactic or school-based  
13  
14 training on hypertension? (response options for first three questions: in the past year, before the  
15  
16 past year, never); ii) have you received a structured long-term (>1 month course) training on  
17  
18 hypertension?; iii) have you received on job training, in-service or supervision on the management  
19  
20 of hypertension?; and iv) do you feel there is need for additional training in the management of  
21  
22 hypertension? (response options: yes, no/not sure).  
23  
24  
25

26 **Questions about health care system context.** The COACH tool consists of 49 questions across  
27  
28 eight subscales. “Organizational Resources” refers to the availability of human capacity and  
29  
30 materials that allow an organization to implement an intervention successfully. “Community  
31  
32 Engagement” refers to mutual communication and activities that occur between community  
33  
34 members and the organization. “Monitoring” refers to the process of using locally derived data to  
35  
36 evaluate performance and plans to improve outcomes. “Sources of Knowledge” refers to the  
37  
38 availability and use of sources of facts, information, and skills acquired by providers through  
39  
40 experience or education in an organization that facilitate best practice. “Commitment to Work”  
41  
42 refers to an individual identification with and involvement in an organization. “Work Culture”  
43  
44 refers to the process of an organization, reflecting a shared set of values, ideas, concepts and rules  
45  
46 of behavior that allow the organization to function. “Leadership” refers to the actions of a person  
47  
48 in the organization who can influence change and excellence in practice, achieved through clarity  
49  
50 and engagement. “Informal Payment” refers to bribe and/or benefits given to an individual outside  
51  
52  
53  
54  
55  
56  
57  
58  
59  
60

1  
2  
3 of the officially accepted arrangements.<sup>15</sup> Respondents were asked to rate their level of agreement  
4 using a five-point Likert scale for all items, except for items in the “Sources of Knowledge”  
5 subscale where the scale is from 0 to 1, regarding the use of the hypertension guidelines within a  
6 specified time frame and the availability of different sources of knowledge.  
7  
8  
9

10  
11  
12 **Translation and adaptation of COACH tool.** The majority of healthcare workers in Rwanda do  
13 not routinely communicate in English. For this reason, the COACH tool was translated from  
14 English to Kinyarwanda (study participants’ daily language), and subsequently back translated to  
15 English by two Rwandan bilingual experts in both English and Kinyarwanda to ensure the  
16 accuracy of the translation. Items that needed further clarification were discussed with the tool  
17 developer and agreement on the translation was reached by consensus. Additionally, we adapted  
18 the questions to be specific in relation to hypertension care (e.g., “This facility is willing to use  
19 new healthcare practices such as guidelines and recommendations for HTN”).  
20  
21  
22  
23  
24  
25  
26  
27  
28  
29

30  
31 **Patient and Public Involvement:** The COACH questionnaire has been previously validated in  
32 LMICs and was modified by the research team to address the context of hypertension in Rwanda  
33 through our weekly calls. The Rwandan co-investigators had primary responsibility for the  
34 translation (English to Kinyarwanda) and back-translation of the COACH questionnaire and for  
35 development, recruitment and conduction of the study. Patients were not involved in the  
36 development, recruitment or conduction of the study. The results of this study has been shared  
37 with stakeholders in Rwanda through our yearly meetings. Additional dissemination with the  
38 ministry of Health, academic institutions, health care providers and others will occur once the  
39 manuscript is published.  
40  
41  
42  
43  
44  
45  
46  
47  
48  
49

50  
51 **Data collection.** Data were collected by in-person interviews, using structured questionnaires in  
52 paper and pencil format, and subsequently transferred in duplicate entry to Qualtrics by members  
53  
54  
55  
56  
57  
58  
59  
60

1  
2  
3 of the research team. There were no missing values for any of the questions and any discrepancies  
4  
5 in data entry were resolved. The survey was administered between May 27 through June 4, 2019.

6  
7 **Analysis.** Demographics are reported as the total number of respondents and percentage in each  
8  
9 group. Differences among hospitals were assessed using chi-square tests or Fisher's exact tests as  
10  
11 appropriate. COACH dimensions are reported as means  $\pm$  standard deviation, for each hospital and  
12  
13 combined across all hospitals. Cronbach's  $\alpha$ , a coefficient of reliability, was used to determine  
14  
15 internal consistency of the test items and the average inter-correlation between the items in each  
16  
17 dimension. Scoring of sources of knowledge dimension ranged from 0 (not available,  
18  
19 never/rarely), 0.5 (occasionally), to 1 (frequently/always); scoring for the other subscales ranged  
20  
21 from 1 (strongly disagree) to 5 (strongly agree).<sup>17</sup> The first six items in the informal payment  
22  
23 dimension were reverse-scored so that the directional interpretation was similar to the other  
24  
25 dimensions.  
26  
27  
28  
29

30  
31 A one-way analysis of variance (ANOVA) was used to test for differences in mean dimension  
32  
33 scores among the three hospitals. All analyses were conducted using SAS, 9.4 (SAS Institute Inc.,  
34  
35 Cary, NC, USA) and *P*-values  $< 0.05$  were considered significant.  
36

### 37 38 **Results**

39  
40 The total number of respondents (n=223) included nurses, midwives, primary care physicians and  
41  
42 specialty physicians (Table 1); similar representation from all three hospitals was obtained across  
43  
44 hospitals. The majority of respondents were female, relatively young, had nursing or midwife  
45  
46 degrees and had limited experience working in hypertension care. The hospitals differed in terms  
47  
48 of number of years of experience of the health care providers working in hypertension care  
49  
50 (p=0.003).  
51  
52  
53  
54  
55  
56  
57  
58  
59  
60

1  
2  
3 **Training in hypertension.** Results of the perspectives of health care providers regarding training  
4 in hypertension care show that nearly all respondents (99%) have participated in a didactic or  
5 school-based training on hypertension at some point during their training and/or career (either in  
6 the past year or before the past year, Table 2). Almost half (44%) of respondents stated having  
7 participated in long-term training (i.e., >1 month course) on hypertension (either in the past year  
8 or before the past year), and a significant majority (72%) had received on the job training, in-  
9 service or supervision on the management of hypertension at some time in their career (either in  
10 the past year or before the past year).  
11  
12  
13  
14  
15  
16  
17  
18  
19  
20

21 The level of training in hypertension varied by hospital, showing statistically significant  
22 differences in having received didactic or school-based training on hypertension in the past year  
23 and before the past year ( $p < 0.001$  for both); in having received long-term training (> 1 month)  
24 before the past year ( $p = 0.014$ ), and having received on job training, in service or supervision on  
25 the management of hypertension in the past year ( $p = 0.008$ ) and never ( $p = 0.002$ ). Finally, almost  
26 all respondents reported the need for additional training in hypertension (99%) without statistically  
27 significant differences between hospitals.  
28  
29  
30  
31  
32  
33  
34  
35  
36

37 **Internal reliability of COACH tool.** Overall, the COACH tool showed very good to high internal  
38 consistency (Cronbach's  $\alpha$  range: 0.57-0.92; Table 3) with all but three dimensions exceeding the  
39 accepted standard for satisfactory internal reliability of >0.70 for new scales. The highest  
40 Cronbach's  $\alpha$  estimates (0.92) was for *Leadership* and the lowest (0.57) was for *Informal payment*.  
41  
42  
43  
44  
45  
46  
47  
48  
49  
50  
51  
52  
53  
54  
55  
56  
57  
58  
59  
60

After removal of two items from the *Informal Payments* subscale (i.e., "Efforts are made to stop clients from providing informal payment to get appropriate healthcare services in hypertension" and "Efforts are made to stop health workers from asking clients for informal payment for hypertension"), Cronbach's  $\alpha$  increased to 0.74. Similarly, for the *Work Culture* subscale, removal

1  
2  
3 of one item (i.e., “This facility helps me to improve and develop my skills in hypertension”)  
4  
5 resulted in a Cronbach’s alpha increase from 0.69 to 0.75. Finally, for *Sources of Knowledge*,  
6  
7 removal of any of the constituent items did not improve Cronbach’s alpha from 0.67.  
8  
9

10 **COACH subscales.** The *Organizational Resources* received a mean score of 3.1, suggesting that  
11  
12 respondents were overall neutral about this scale (Tables 4 and 5). The majority of respondents  
13  
14 stated their agreement with only three of eleven dimensions, including “facility has access to  
15  
16 transport and fuel that are needed to provide healthcare services for HTN” (50% agreed), “facility  
17  
18 has access to the communication tools that are needed to provide healthcare services for HTN  
19  
20 (54%), and the “facility has enough disposable medical equipment to provide healthcare services  
21  
22 for HTN” (83% agreed). For the remaining eight dimensions, greater than 50% of respondents  
23  
24 were either neutral or disagreed with the dimensions dealing with *Human Resources*, *Space*,  
25  
26 *Medicine and Equipment* and *Financing*, suggesting that there is room for improvement in these  
27  
28 areas.  
29  
30  
31

32  
33 The *Community Engagement* received a mean score of 3.5, suggesting that respondents were  
34  
35 slightly more favorable than neutral about the commitment of their hospitals towards their  
36  
37 community (Table 5). In fact, four of the five dimensions had more than half of the respondents  
38  
39 agreeing with community engagement in hypertension care, with only one dimension, “in this  
40  
41 facility, we encourage other organizations to contribute to improving HTN in the community”  
42  
43 showing a majority being either neutral (36%) or disapproving (27%).  
44  
45

46  
47 The *Monitoring Services for Action* received a mean score of 3.2, suggesting that respondents were  
48  
49 neutral about the use of monitoring services for hypertension care. Of the five dimensions, only  
50  
51 one, “this facility regularly compares its work with national or other guidelines for HTN” (61%)  
52  
53 showed agreement by more than half of the respondents.  
54  
55  
56  
57  
58  
59  
60

1  
2  
3 The *Commitment to Work* received a mean score of 4.2, suggesting that respondents are committed  
4 to their hospitals. All three dimensions showed approval by a significant majority (ranging from  
5 70% to 94%).  
6  
7

8  
9  
10 The *Leadership* subscale received a mean score of 4.1, suggesting that respondents are supportive  
11 of their leadership. All six dimensions had more than half of the respondents (81% to 92%)  
12 agreeing with high remarks for their leadership.  
13  
14

15  
16 The *Informal Payment* received a mean score of 4.7, suggesting that respondents do not have  
17 concerns with informal payments, nepotism or accountability. In fact, in six of eight dimensions,  
18 more than half of the respondents (83% to 98%) indicated no concerns with these issues. However,  
19 in the dimension of *Accountability* the low mean score of 2.8 is also reflected by a majority of  
20 combined neutral and disagree responses regarding “efforts are made to stop clients from providing  
21 informal payment to get appropriate healthcare services in HTN” (22% and 44%, respectively),  
22 and “efforts are made to stop health workers from asking clients for informal payment for HTN”  
23 (18% and 44%, respectively).  
24  
25

26  
27 The *Sources of Knowledge* received a mean score of 0.6 (scale range: range 0-1), with discordant  
28 result in three of five dimensions: while a majority agreed that they have access to information  
29 regarding hypertension guidelines, stating agreed for “clinical practice guidelines for HTN” (61%),  
30 “printed material for work with HTN” (54%), and use of “internet for HTN” (50%), the majority  
31 responded with either occasionally or never/rarely responses regarding “in-service training/  
32 workshops/courses for HTN” (18% and 46%, respectively) and “electronic decision support for  
33 HTN” (13% and 47%, respectively).  
34  
35

## 36 37 38 39 40 41 42 43 44 45 46 47 48 49 50 51 **Discussion** 52 53 54 55 56 57 58 59 60

1  
2  
3 The purpose of this study was to examine the contextual factors influencing hypertension care at  
4 three provincial/district hospitals in Rwanda, ascertained after completion of the COACH tool, a  
5 survey validated for use in LMIC, and a questionnaire about training in hypertension. The main  
6 findings of the study indicate an overwhelming agreement from the majority of respondents for  
7 the increased and/or continuous training in hypertension care, as ascertained in the Training  
8 Questionnaire and in the COACH *Knowledge* and *Organizational Resources* subscales.  
9

10  
11 The high scores in the *Work Culture* and *Leadership* subscales is not surprising to our research  
12 team, as we have been collaborating with healthcare providers from these three hospitals for  
13 several years. While healthcare respondents in general stated a commitment to work and reported  
14 supportive leadership, they also acknowledged challenges with resources and monitoring services.  
15 That is, even with such strong leadership in support of hypertension care, respondents stated the  
16 need to increase human capacity and improve skills in delivering hypertension care. Additionally,  
17 scores on the *Monitoring* subscale indicate that, while they perceive that the hospital leadership  
18 can influence change and excellent in practice, they questioned whether the hospital used data to  
19 evaluate performance to improve hypertension outcomes.  
20

21  
22 These findings provide us with contextual guidance for development of training strategies prior to  
23 implementation of a comprehensive and sustainable hypertension care program in Rwanda. That  
24 is, based on the data, the training program should focus on providing further knowledge and  
25 understanding of the hypertension guidelines, and on developing strategies to increase human  
26 capacity and monitoring of skills around hypertension care in these hospitals. The results also  
27 indicate that we need to develop implementation strategies to support hypertension care in their  
28 hospitals and think about how to increase skills on hypertension care and establish a monitoring  
29 system to support guideline adherence. As this study is part of long-term capacity building efforts  
30  
31  
32  
33  
34  
35  
36  
37  
38  
39  
40  
41  
42  
43  
44  
45  
46  
47  
48  
49  
50  
51  
52  
53  
54  
55  
56  
57  
58  
59  
60

1  
2  
3 to strengthening dissemination and implementation science and hypertension science in Rwanda,  
4  
5 our team is currently supporting the development of several studies, led by our trainees in Rwanda,  
6  
7 to examine implementation strategies to support the hypertension care in these hospitals.  
8  
9

10 The findings of the COACH tool were illuminating and will guide our next steps, however, the  
11  
12 *Informal Payment* and *Sources of Knowledge* subscales exhibited low Cronbach's  $\alpha$  internal  
13  
14 reliability scores. Other studies have found similar challenges with these subscales indicating that  
15  
16 additional work is needed in these subscales.<sup>17</sup> Regarding the subscale *Work Culture*, it is unclear  
17  
18 why the item "This facility helps me to improve and develop my skills in hypertension" was  
19  
20 challenging in our study. Further cognitive interview with the Kinyarwanda translation of the tool  
21  
22 are needed to understand challenges with this item.  
23  
24  
25

26 There were significant differences in the mean scores across hospitals between the *Organizational*  
27  
28 *Resources*, *Monitoring Services*, *Sources of Knowledge*, *Work Culture*, *Leadership*, and *Informal*  
29  
30 *Payment* subscales, indicating the tool's ability to identify differences in these contextual factors.  
31  
32

33 Assessment of the context of three hospitals provides guidance for our next training, selection and  
34  
35 adaptation of implementation strategies to improve hypertension care in three hospitals in Rwanda.  
36  
37 The overall good validity of the COACH tool indicates that it is comprehensible in Kinyarwanda  
38  
39 and able to capture differences across settings.  
40  
41

42 The Context Assessment for Community Health (COACH) tool was originally developed in five  
43  
44 LMICs (Bangladesh, Vietnam, Uganda, South Africa, Nicaragua), and more recently applied in  
45  
46 Mozambique to assess healthcare context and its potential use for integration of evidence-based  
47  
48 interventions and to develop their implementation in clinical practice in LMICs.(16-18) The  
49  
50 internal consistency of the COACH tool in a sample of providers in Rwanda, a different country  
51  
52  
53  
54  
55  
56  
57  
58  
59  
60



1  
2  
3 from where the tool was developed and tested, show its utility to measure contextual dimensions  
4  
5 in another LMIC.  
6

7 **Limitations of the study.** While we gathered important information for our next steps in terms of  
8  
9 context and need for additional training in hypertension care, we did not examine the specific areas  
10  
11 where the respondents need training in terms of hypertension care (e.g., epidemiology, diagnosis,  
12  
13 treatment). To further examine the hypertension care in these hospitals, we will gather qualitative  
14  
15 data through focus groups with our stakeholders. Finally, the internal consistency of the COACH  
16  
17 subscales after removal of the items was satisfactory, but further studies need to examine the  
18  
19 challenges in the *Informal Payment* subscale and its low Cronbach alpha, also reported in other  
20  
21 studies (18).  
22  
23  
24

## 25 26 **Conclusions.**

27  
28 Contextual measures related to hypertension care in Rwanda shows a need for increased and/or  
29  
30 continuous training. Healthcare responders stated a general commitment to work and reported  
31  
32 supportive leadership while acknowledging challenges with resources and monitoring services.  
33  
34 COACH tool provides contextual guidance for development of training strategies prior to  
35  
36 implementation of a comprehensive and sustainable hypertension care program in Rwanda.  
37  
38  
39  
40  
41

42 **Acknowledgements.** We acknowledge all providers who responded to the survey. This work was  
43  
44 supported in part by NHLBI grants U24HL136790, D43TW10335, 3U01HL133994 and  
45  
46 UL1TR00234.  
47  
48

49 **Author contributions.** Ana A. Baumann (AAB), Cole Hooley (CH), Charles W. Goss (CWG),  
50  
51 Vincent Mutabazi (VM), Angela L. Brown (ALB), Kenneth Schechtman (KS), Marc  
52  
53 Twagirumukiza (MT), Lisa de las Fuentes (LDF), Dominic Reeds (DR), Makeda Williams (MW),  
54  
55  
56  
57  
58  
59  
60

1  
2  
3 Eugene Mutimura (EM), Anna Bergström (AB), Aurore Nishimwe (AN), Cecile Ingabire CI), and  
4 Victor G. Davila-Roman (VGD-R) conceptualized the study. AAB, CH, and VM organized the  
5 survey. VM led COACH tool translation and back translation and was responsible for data  
6 collection. CH was responsible for data management. CWG was responsible for data analysis.  
7  
8 AAB, CH, CWG and VGD-R drafted initial version of manuscript. All co-authors read,  
9  
10 contributed to and approved the final manuscript.  
11  
12  
13  
14  
15

16  
17 **Competing interests statement:** The authors declare no competing interest.  
18

19 **Disclosure statement.** No potential conflict of interest was reported by any of the authors.  
20

21 **Ethics and consent.** This study was approved by University of Rwanda-CMHS Institutional  
22 Review Board (approval notice: 099/CMSH IRB 2019) and by Washington University School of  
23 Medicine Institutional Review Board Committee (IRB # 201807048). Participants were informed  
24 of the potential risks and benefits of the study and signed an informed consent form in  
25 Kinyarwanda language before enrolment in the study. All participant data were anonymized to  
26 optimize privacy and confidentiality of responses.  
27  
28  
29  
30  
31  
32  
33  
34  
35  
36  
37

## 38 **References**

- 39  
40 1. GBD 2017 Risk Factor Collaborators. Global, regional, and national comparative risk  
41 assessment of 84 behavioural, environmental and occupational, and metabolic risks or  
42 clusters of risks for 195 countries and territories, 1990-2017: A systematic analysis for the  
43 Global Burden of Disease Study 2017. *Lancet*. 2018;392:1923-1994.  
44
- 45 2. WHO. Raised blood pressure. Accessed July 23, 2020.  
46 [https://www.who.int/gho/ncd/risk\\_factors/blood\\_pressure\\_prevalence\\_text/en/](https://www.who.int/gho/ncd/risk_factors/blood_pressure_prevalence_text/en/)  
47
- 48 3. Lloyd-Sherlock P, Beard J, Minicuci N, Ebrahim S, Chatterji S. Hypertension among older  
49 adults in low- and middle-income countries: prevalence, awareness and control. *Int J*  
50 *Epidemiol*. 2014;43(1):116-128. doi:10.1093/ije/dyt215  
51  
52
- 53 4. Forouzanfar MH, Liu P, Roth GA, et al. Global Burden of Hypertension and Systolic Blood  
54 Pressure of at Least 110 to 115 mm Hg, 1990-2015. *JAMA*. 2017;317(2):165-182.  
55 doi:10.1001/jama.2016.19043  
56  
57

- 1
  - 2
  - 3
  - 4
  - 5
  - 6
  - 7
  - 8
  - 9
  - 10
  - 11
  - 12
  - 13
  - 14
  - 15
  - 16
  - 17
  - 18
  - 19
  - 20
  - 21
  - 22
  - 23
  - 24
  - 25
  - 26
  - 27
  - 28
  - 29
  - 30
  - 31
  - 32
  - 33
  - 34
  - 35
  - 36
  - 37
  - 38
  - 39
  - 40
  - 41
  - 42
  - 43
  - 44
  - 45
  - 46
  - 47
  - 48
  - 49
  - 50
  - 51
  - 52
  - 53
  - 54
  - 55
  - 56
  - 57
  - 58
  - 59
  - 60
5. Nahimana M, Nyandwi A, Muhimpundu MA, et al. A population-based national estimate of the prevalence and risk factors associated with hypertension in Rwanda: implications for prevention and control. *BMC Public Health*. 2017;18. doi:10.1186/s12889-017-4536-9
6. Rwanda Ministry of Health. Ministry of Health. Accessed July 23, 2020. <https://moh.gov.rw/index.php?id=188>
7. Twagirumukiza M, De Bacquer D, Kips JG, de Backer G, Stichele RV, Van Bortel LM. Current and projected prevalence of arterial hypertension in sub-Saharan Africa by sex, age and habitat: an estimate from population studies. *J Hypertens*. 2011;29(7):1243-1252. doi:10.1097/HJH.0b013e328346995d
8. Zhou B, Bentham J, Cesare MD, et al. Worldwide trends in blood pressure from 1975 to 2015: a pooled analysis of 1479 population-based measurement studies with 19·1 million participants. *The Lancet*. 2017;389(10064):37-55. doi:10.1016/S0140-6736(16)31919-5
9. World Health Organization. World Health Rankings. World Life Expectancy (2016). Accessed July 23, 2020. <https://www.worldlifeexpectancy.com/world-health-rankings>
10. de Ramirez SS, Enquobahrie DA, Nyadzi G, et al. Prevalence and correlates of hypertension: a cross-sectional study among rural populations in sub-Saharan Africa. *J Hum Hypertens*. 2010;24(12):786-795. doi:10.1038/jhh.2010.14
11. Baumann A, Hooley C, Mutabazi V, et al. Training implementation research in Rwanda: Evaluation, challenges and lessons learned. *AcademyHealth* (2019). <https://academyhealth.confex.com/academyhealth/2019di/meetingapp.cgi/Paper/35206>
12. Kirchner JE, Smith JL, Powell BJ, Waltz TJ, Proctor EK. Getting a clinical innovation into practice: An introduction to implementation strategies. *Psychiatry Res*. 2020;283:112467. doi:10.1016/j.psychres.2019.06.042
13. Powell BJ, Beidas RS, Lewis CC, et al. Methods to Improve the Selection and Tailoring of Implementation Strategies. *J Behav Health Serv Res*. 2017;44(2):177-194. doi:10.1007/s11414-015-9475-6
14. Kitson AL, Rycroft-Malone J, Harvey G, McCormack B, Seers K, Titchen A. Evaluating the successful implementation of evidence into practice using the PARIHS framework: theoretical and practical challenges. *Implement Sci*. 2008;3(1):1. doi:10.1186/1748-5908-3-1
15. Bergström A, Skeen S, Duc DM, et al. Health system context and implementation of evidence-based practices—development and validation of the Context Assessment for Community Health (COACH) tool for low- and middle-income settings. *Implement Sci*. 2015;10(1):120. doi:10.1186/s13012-015-0305-2
16. Duc DM, Bergström A, Eriksson L, Selling K, Thi Thu Ha B, Wallin L. Response process and test-retest reliability of the Context Assessment for Community Health tool in Vietnam. *Glob Health Action*. 2016;9(1):31572. doi:10.3402/gha.v9.31572

- 1  
2  
3 17. Mocumbi S, McKee K, Munguambe K, et al. Ready to deliver maternal and newborn care?  
4 Health providers' perceptions of their work context in rural Mozambique. *Glob Health*  
5 *Action*. 2018;11(1):1532631. doi:10.1080/16549716.2018.1532631  
6  
7  
8  
9  
10  
11  
12  
13  
14  
15  
16  
17  
18  
19  
20  
21  
22  
23  
24  
25  
26  
27  
28  
29  
30  
31  
32  
33  
34  
35  
36  
37  
38  
39  
40  
41  
42  
43  
44  
45  
46  
47  
48  
49  
50  
51  
52  
53  
54  
55  
56  
57  
58  
59  
60

For peer review only

**Table 1.** Participant demographics reported as n (%).

| Variable                                | Group                  | All<br>(N = 223) | Hospital A<br>(N=74) | Hospital B<br>(N=70) | Hospital C<br>(N=79) | p value |
|-----------------------------------------|------------------------|------------------|----------------------|----------------------|----------------------|---------|
| Age                                     | 20-35 years            | 125 (56%)        | 40 (54%)             | 40 (57%)             | 45 (57%)             | 0.914   |
|                                         | ≥36 years              | 98 (44%)         | 34 (46%)             | 30 (43%)             | 34 (43%)             |         |
| Gender                                  | Female                 | 168 (75%)        | 51 (69%)             | 53 (76%)             | 64 (81%)             | 0.2     |
| Education                               | Nurse                  | 142 (64%)        | 46 (62%)             | 47 (67%)             | 49 (62%)             | 0.811   |
|                                         | Midwife                | 42 (19%)         | 17 (23%)             | 11 (16%)             | 14 (18%)             |         |
|                                         | Primary care physician | 28 (13%)         | 9 (12%)              | 9 (13%)              | 10 (13%)             |         |
|                                         | Physician specialist   | 11 (5%)          | 2 (3%)               | 3 (4%)               | 6 (8%)               |         |
| Experience working in hypertension care | 0-3 years              | 114 (51%)        | 32 (43%)             | 28 (40%)             | 54 (68%)             | 0.003   |
|                                         | 4-9 years              | 64 (29%)         | 27 (37%)             | 22 (31%)             | 15 (19%)             |         |
|                                         | ≥10 years              | 45 (20%)         | 15 (20%)             | 20 (29%)             | 10 (13%)             |         |

**Table 2.** Participant hypertension training history reported as number and % of those responding “Yes”.

| Variable                                                                                      | All<br>(N=223) | Hospital A<br>(N=74) | Hospital B<br>(N=70) | Hospital C<br>(N=79) | p value |
|-----------------------------------------------------------------------------------------------|----------------|----------------------|----------------------|----------------------|---------|
| <b>Have you received didactic or school-based training on HTN?</b>                            |                |                      |                      |                      |         |
| A. In the past year                                                                           | 72 (32%)       | 34(46%)              | 24 (34%)             | 14 (18%)             | <.001   |
| B. Before the past year                                                                       | 162 (73%)      | 42 (57%)             | 51 (73%)             | 69 (87%)             | <.001   |
| C. Never                                                                                      | 3 (1%)         | 2 (3%)               | 1 (1%)               | 0                    | 0.311   |
| <b>Have you received a structured long-term (&gt;1 month course) training on HTN?</b>         |                |                      |                      |                      |         |
| A. In the past year                                                                           | 41 (18%)       | 18 (24%)             | 9 (13%)              | 14 (18%)             | 0.203   |
| B. Before the past year                                                                       | 58 (26%)       | 28 (38%)             | 16 (23%)             | 14 (18%)             | 0.014   |
| C. Never                                                                                      | 160 (72%)      | 45 (61%)             | 54 (77%)             | 61 (77%)             | 0.038   |
| <b>Have you received on job training, in-service or supervision on the management of HTN?</b> |                |                      |                      |                      |         |
| A. In the past year                                                                           | 81 (36%)       | 33 (45%)             | 30 (43%)             | 18 (23%)             | 0.008   |
| B. Before the past year                                                                       | 79 (36%)       | 31 (42%)             | 26 (37%)             | 22 (28%)             | 0.18    |
| C. Never                                                                                      | 109 (49%)      | 29 (39%)             | 29 (41%)             | 51 (65%)             | 0.002   |
| <b>Do you feel there is need for additional training in the management of HTN?</b>            |                |                      |                      |                      |         |
| Yes                                                                                           | 220 (99%)      | 73 (99%)             | 70 (100%)            | 77 (97%)             | 0.776   |

**Table 3.** Cronbach alpha estimates for the different COACH dimensions.

| <b>Dimension</b>                                      | <b>Items</b> | <b>Score range</b> | <b>Cronbach <math>\alpha</math></b> |
|-------------------------------------------------------|--------------|--------------------|-------------------------------------|
| Organizational resources                              | 11           | 1-5                | 0.83                                |
| Community engagement                                  | 5            | 1-5                | 0.80                                |
| Monitoring services for action                        | 5            | 1-5                | 0.74                                |
| Commitment to work                                    | 3            | 1-5                | 0.77                                |
| Work culture                                          | 6            | 1-5                | 0.69                                |
| Work culture, with questions removed <sup>a</sup>     | 5            | 1-5                | 0.75                                |
| Leadership                                            | 6            | 1-5                | 0.92                                |
| Informal payment                                      | 8            | 1-5                | 0.57                                |
| Informal payment, with questions removed <sup>b</sup> | 6            | 1-5                | 0.74                                |
| Sources of knowledge                                  | 5            | 0-1                | 0.67                                |

Note: a: item: item “This facility helps me to improve and develop my skills in hypertension” removed; b: items “Efforts are made to stop clients from providing informal payment to get appropriate healthcare services in hypertension” and “Efforts are made to stop health workers from asking clients for informal payment for hypertension” were removed.

**Table 4.** Overall mean  $\pm$  standard deviation and by hospital for the COACH subscales.

| Dimensions                            | All<br>(N=223)                | Hospital<br>A<br>(N=74)       | Hospital<br>B<br>(N=70)       | Hospital<br>C<br>(N=79)       | p value          |
|---------------------------------------|-------------------------------|-------------------------------|-------------------------------|-------------------------------|------------------|
| <b>Organizational resources</b>       | <b>3.1<math>\pm</math>0.6</b> | <b>3.3<math>\pm</math>0.8</b> | <b>2.9<math>\pm</math>0.5</b> | <b>3.1<math>\pm</math>0.5</b> | <b>&lt;0.001</b> |
| Human Resources                       | 2.6 $\pm$ 1.0                 | 3.2 $\pm$ 1.1                 | 2.4 $\pm$ 0.9                 | 2.3 $\pm$ 0.8                 | <0.001           |
| Space                                 | 3.0 $\pm$ 1.1                 | 3.2 $\pm$ 1.2                 | 2.7 $\pm$ 1.1                 | 3.0 $\pm$ 1.1                 | 0.032            |
| Communication and transport           | 3.3 $\pm$ 1.0                 | 3.3 $\pm$ 1.1                 | 3.2 $\pm$ 1.0                 | 3.4 $\pm$ 0.8                 | 0.699            |
| Financing                             | 2.9 $\pm$ 0.7                 | 3.1 $\pm$ 0.8                 | 2.7 $\pm$ 0.6                 | 2.9 $\pm$ 0.5                 | <0.001           |
| Medicines and equipment               | 3.3 $\pm$ 0.8                 | 3.4 $\pm$ 0.9                 | 3.0 $\pm$ 0.7                 | 3.5 $\pm$ 0.7                 | <0.001           |
| <b>Community engagement</b>           | <b>3.5<math>\pm</math>0.7</b> | <b>3.5<math>\pm</math>0.8</b> | <b>3.4<math>\pm</math>0.7</b> | <b>3.6<math>\pm</math>0.5</b> | <b>0.118</b>     |
| <b>Monitoring services for action</b> | <b>3.2<math>\pm</math>0.6</b> | <b>3.3<math>\pm</math>0.8</b> | <b>3.0<math>\pm</math>0.6</b> | <b>3.2<math>\pm</math>0.5</b> | <b>0.001</b>     |
| <b>Commitment to work</b>             | <b>4.2<math>\pm</math>0.7</b> | <b>4.3<math>\pm</math>0.6</b> | <b>4.2<math>\pm</math>0.7</b> | <b>4.1<math>\pm</math>0.8</b> | <b>0.155</b>     |
| <b>Work culture</b>                   | <b>4.1<math>\pm</math>0.5</b> | <b>4.0<math>\pm</math>0.7</b> | <b>4.0<math>\pm</math>0.5</b> | <b>4.3<math>\pm</math>0.4</b> | <b>0.002</b>     |
| Culture of learning and change        | 3.8 $\pm$ 0.6                 | 3.8 $\pm$ 0.7                 | 3.8 $\pm$ 0.7                 | 3.7 $\pm$ 0.5                 | 0.768            |
| Culture of responsibility             | 4.1 $\pm$ 0.6                 | 4.0 $\pm$ 0.8                 | 4.0 $\pm$ 0.5                 | 4.4 $\pm$ 0.4                 | <0.001           |
| <b>Leadership</b>                     | <b>4.1<math>\pm</math>0.7</b> | <b>4.1<math>\pm</math>0.8</b> | <b>4.3<math>\pm</math>0.5</b> | <b>3.9<math>\pm</math>0.7</b> | <b>0.01</b>      |
| <b>Informal payment</b>               | <b>4.7<math>\pm</math>0.5</b> | <b>4.5<math>\pm</math>0.6</b> | <b>4.7<math>\pm</math>0.4</b> | <b>4.8<math>\pm</math>0.3</b> | <b>0.003</b>     |
| Accountability                        | 2.8 $\pm$ 1.5                 | 2.7 $\pm$ 1.5                 | 3.5 $\pm$ 1.3                 | 2.3 $\pm$ 1.3                 | <0.001           |
| Informal payment*                     | 4.7 $\pm$ 0.5                 | 4.6 $\pm$ 0.6                 | 4.8 $\pm$ 0.4                 | 4.8 $\pm$ 0.3                 | 0.002            |
| Nepotism*                             | 4.6 $\pm$ 0.6                 | 4.5 $\pm$ 0.7                 | 4.6 $\pm$ 0.6                 | 4.7 $\pm$ 0.6                 | 0.087            |
| <b>Sources of knowledge†</b>          | <b>0.6<math>\pm</math>0.3</b> | <b>0.6<math>\pm</math>0.3</b> | <b>0.5<math>\pm</math>0.3</b> | <b>0.7<math>\pm</math>0.3</b> | <b>0.003</b>     |

All values represent mean  $\pm$  standard deviation. Bolded items indicate COACH subscales; those below the subscales indicate the dimensions within the subscales.

†Score range for Sources of Knowledge is: 0-1; for all other subscales the score range is: 1-5.

\*Items on informal payment and Nepotism were reverse-scored.



Table 5. Descriptive values of items and dimensions of the COACH tool in Rwanda (N = 223)

| Scaled Dimensions/Items                                                                                                                | Mean | Median | Disagree   | Neutral   | Agree     |
|----------------------------------------------------------------------------------------------------------------------------------------|------|--------|------------|-----------|-----------|
| <b>Organizational resources</b>                                                                                                        | 3.1  | 3.0    | -          | -         | -         |
| <b><u>Human resources</u></b>                                                                                                          | 2.6  | 2.5    | -          | -         | -         |
| This facility has enough workers with the right training and skills to do everything that needs to be done for HTN                     | 2.7  | 2.0    | 121 (54%)  | 43 (19%)  | 59 (27%)  |
| This facility has enough workers with the right training and skills to do their job in the best possible way for HTN                   | 2.6  | 2.0    | 123 (55%)  | 41 (18%)  | 59 (27%)  |
| <b><u>Space</u></b>                                                                                                                    | 3.0  | 3.0    | -          | -         | -         |
| This facility has enough space to provide healthcare services for HTN                                                                  | 3.0  | 3.0    | 96 (43%)   | 29 (13%)  | 98 (44%)  |
| <b><u>Communication and transport</u></b>                                                                                              | 3.3  | 3.5    | -          | -         | -         |
| This facility has access to the transport and fuel that are needed to provide healthcare services for HTN                              | 3.3  | 4.0    | 60 (27%)   | 51 (23%)  | 112 (50%) |
| This facility has access to the communication tools (e.g. telephones or radios) that are needed to provide healthcare services for HTN | 3.3  | 4.0    | 65 (29%)   | 37 (17%)  | 121 (54%) |
| <b><u>Financing</u></b>                                                                                                                | 2.9  | 3.0    | -          | -         | -         |
| This facility receives money according to a budget for HTN                                                                             | 2.9  | 3.0    | 42 (19%)   | 153 (69%) | 28 (13%)  |
| This facility has money that we can decide how to use for HTN                                                                          | 2.9  | 3.0    | 52 (23%)   | 140 (63%) | 31 (14%)  |
| <b><u>Medicines and equipment</u></b>                                                                                                  | 3.3  | 3.5    | -          | -         | -         |
| This facility has enough medicine to provide healthcare services for HTN                                                               | 3.1  | 3.0    | 81 (36%)   | 39 (18%)  | 103 (46%) |
| This facility has enough functional equipment to provide healthcare services for HTN                                                   | 3.1  | 3.0    | 80 (35.9%) | 38 (17%)  | 105 (47%) |
| This facility has enough disposable medical equipment, such as syringes, gloves and needles to provide healthcare services for HTN     | 4.0  | 4.0    | 24 (11%)   | 15 (7%)   | 184 (83%) |
| If the workload increases, the facility can get additional resources such as medicine and equipment for HTN                            | 3.1  | 3.0    | 59 (27%)   | 84 (38%)  | 80 (36%)  |
| <b>Community engagement</b>                                                                                                            | 3.5  | 3.6    | -          | -         | -         |

|                                                                                                                                     |     |     |           |           |           |
|-------------------------------------------------------------------------------------------------------------------------------------|-----|-----|-----------|-----------|-----------|
| In this facility, we ask community members what they think about the healthcare services that we provide for HTN                    | 3.3 | 4.0 | 46 (21%)  | 63 (28%)  | 114 (51%) |
| In this facility, we listen to what community members think about the healthcare services we provide for HTN                        | 3.7 | 4.0 | 30 (14%)  | 41 (18%)  | 152 (68%) |
| In this facility, we have meetings with community members to discuss health matters regarding HTN                                   | 3.6 | 4.0 | 30 (14%)  | 48 (22%)  | 145 (65%) |
| In this facility, we encourage community members to contribute to improving HTN in the community                                    | 3.7 | 4.0 | 29 (13%)  | 33 (15%)  | 161 (72%) |
| In this facility, we encourage other organizations to contribute to improving HTN in the community                                  | 3.3 | 3.0 | 44 (20%)  | 81 (36%)  | 98 (44%)  |
| <b>Monitoring services for action</b>                                                                                               | 3.2 | 3.2 | -         | -         | -         |
| I receive regular updates about the facility's performance on HTN based on information/data collected from our facility             | 2.7 | 3.0 | 110 (49%) | 51 (23%)  | 62 (28%)  |
| This facility discusses information/data from our facility on HTN in a regular, formal way, such as in regularly scheduled meetings | 3.2 | 3.0 | 60 (27%)  | 73 (33%)  | 90 (41%)  |
| This facility regularly uses facility information/data to make plans for improving its healthcare services for HTN                  | 3.1 | 3.0 | 41 (18%)  | 108 (48%) | 74 (33%)  |
| This facility regularly monitors its work by comparing it with the facility's action plans for HTN                                  | 3.2 | 3.0 | 30 (14%)  | 117 (53%) | 76 (34%)  |
| This facility regularly compares its work with national or other guidelines for HTN                                                 | 3.6 | 4.0 | 19 (9%)   | 68 (31%)  | 136 (61%) |
| <b>Commitment to work</b>                                                                                                           | 4.2 | 4.3 | -         | -         | -         |
| I am proud to work in this facility                                                                                                 | 4.0 | 4.0 | 16 (7%)   | 24 (11%)  | 183 (82%) |
| I am satisfied to work in this facility                                                                                             | 3.9 | 4.0 | 24 (11%)  | 23 (10%)  | 176 (79%) |
| I feel encouraged to do my very best at work                                                                                        | 4.6 | 5.0 | 6 (3%)    | 8 (4%)    | 209 (94%) |
| <b>Work culture</b>                                                                                                                 | 4.1 | 4.2 | -         | -         | -         |
| <b><u>Culture of learning and change</u></b>                                                                                        | 3.8 | 3.7 | -         | -         | -         |
| This facility is willing to use new healthcare practices such as guidelines and recommendations for HTN                             | 3.9 | 4.0 | 8 (4%)    | 45 (20%)  | 170 (76%) |
| This facility helps me to improve and develop my skills in HTN                                                                      | 3.1 | 3.0 | 87 (39%)  | 37 (17%)  | 99 (44%)  |
| I am encouraged to seek new information on healthcare practices for HTN                                                             | 4.4 | 4.0 | 7 (3%)    | 13 (6%)   | 203 (91%) |
| <b><u>Culture of responsibility</u></b>                                                                                             | 4.1 | 4.0 | -         | -         | -         |

|    |                                                                            |     |     |          |          |           |
|----|----------------------------------------------------------------------------|-----|-----|----------|----------|-----------|
| 1  |                                                                            |     |     |          |          |           |
| 2  |                                                                            |     |     |          |          |           |
| 3  | This facility works for the good of the clients and puts their needs first | 3.8 | 4.0 | 17 (8%)  | 51 (23%) | 155 (70%) |
| 4  | in treatment of HTN                                                        |     |     |          |          |           |
| 5  | Members of the facility feel personally responsible for improving          | 4.2 | 4.0 | 3 (1%)   | 34 (15%) | 186 (83%) |
| 6  | healthcare services for HTN                                                |     |     |          |          |           |
| 7  | Members of the facility approach clients with HTN with respect             | 4.4 | 4.0 | 3 (1%)   | 10 (5%)  | 210 (94%) |
| 8  |                                                                            |     |     |          |          |           |
| 9  | <b>Leadership</b>                                                          | 4.1 | 4.0 | -        | -        | -         |
| 10 | I trust the facility leader                                                | 4.2 | 4.0 | 9 (4%)   | 11 (5%)  | 203 (91%) |
| 11 | The leader handles stressful situations calmly                             | 4.0 | 4.0 | 13 (6%)  | 26 (12%) | 184 (83%) |
| 12 | The leader actively listens, acknowledges, and then responds to            | 4.0 | 4.0 | 14 (6%)  | 22 (10%) | 187 (84%) |
| 13 | requests and concerns                                                      |     |     |          |          |           |
| 14 | The leader effectively resolves any conflicts that arise                   | 4.1 | 4.0 | 9 (4%)   | 16 (7%)  | 198 (89%) |
| 15 | The leader encourages the introduction of new ideas and practices          | 4.2 | 4.0 | 6 (3%)   | 13 (6%)  | 204 (92%) |
| 16 | The leader makes things happen                                             | 4.0 | 4.0 | 11 (5%)  | 32 (14%) | 180 (81%) |
| 17 |                                                                            |     |     |          |          |           |
| 18 | <b>Informal payment</b>                                                    | 4.7 | 4.8 | -        | -        | -         |
| 19 |                                                                            |     |     |          |          |           |
| 20 | <b><u>Informal payment</u></b>                                             | 4.7 | 5.0 | -        | -        | -         |
| 21 | Clients must always give informal payment to health workers to             | 4.9 | 5.0 | 1 (0.4%) | 3 (1%)   | 219 (98%) |
| 22 | access healthcare services for HTN                                         |     |     |          |          |           |
| 23 | Clients are treated more quickly if they make informal payments to         | 4.9 | 5.0 | 3 (1%)   | 5 (2%)   | 215 (96%) |
| 24 | health workers for HTN                                                     |     |     |          |          |           |
| 25 | Medicines or equipment for HTN that should be available for free to        | 4.6 | 5.0 | 5 (2%)   | 24 (11%) | 194 (87%) |
| 26 | clients have been sold in this facility                                    |     |     |          |          |           |
| 27 | Health workers are sometimes absent from work earning money at             | 4.5 | 5.0 | 5 (2%)   | 34 (15%) | 184 (83%) |
| 28 | other places                                                               |     |     |          |          |           |
| 29 |                                                                            | 4.6 | 5.0 | -        | -        | -         |
| 30 | <b><u>Nepotism</u></b>                                                     |     |     |          |          |           |
| 31 | Health workers in this facility give healthcare services for HTN to        | 4.7 | 5.0 | 4 (2%)   | 10 (5%)  | 209 (94%) |
| 32 | friends and family first                                                   |     |     |          |          |           |
| 33 | Health workers in this facility give jobs or other benefits to friends     | 4.5 | 5.0 | 10 (5%)  | 28 (13%) | 185 (83%) |
| 34 | and family first                                                           |     |     |          |          |           |
| 35 |                                                                            | 2.8 | 3.0 | -        | -        | -         |
| 36 | <b><u>Accountability</u></b>                                               |     |     |          |          |           |
| 37 | Efforts are made to stop clients from providing informal payment to        | 2.8 | 3.0 | 99 (44%) | 49 (22%) | 75 (34%)  |
| 38 | get appropriate healthcare services in HTN                                 |     |     |          |          |           |
| 39 | Efforts are made to stop health workers from asking clients for            | 2.8 | 3.0 | 97 (44%) | 40 (18%) | 86 (39%)  |
| 40 | informal payment for HTN                                                   |     |     |          |          |           |
| 41 |                                                                            |     |     |          |          |           |
| 42 |                                                                            |     |     |          |          |           |
| 43 |                                                                            |     |     |          |          |           |
| 44 |                                                                            |     |     |          |          |           |
| 45 |                                                                            |     |     |          |          |           |
| 46 |                                                                            |     |     |          |          |           |
| 47 |                                                                            |     |     |          |          |           |

| <b>Non-scaled dimension/items</b>                                                                                                        | <b>Mean</b> | <b>Median</b> | <b>NA, never,<br/>rarely</b> | <b>Occasionally</b> | <b>Frequently,<br/>always</b> |
|------------------------------------------------------------------------------------------------------------------------------------------|-------------|---------------|------------------------------|---------------------|-------------------------------|
| <b>Sources of Knowledge</b>                                                                                                              | 0.6         | 0.6           | -                            | -                   | -                             |
| Clinical practice guidelines for HTN                                                                                                     | 0.7         | 1.0           | 52 (23%)                     | 35 (16%)            | 136 (61%)                     |
| Other printed material for work (e.g. textbooks, journals) with HTN                                                                      | 0.6         | 1.0           | 58 (26%)                     | 45 (20%)            | 120 (54%)                     |
| In-service training/ workshops/courses for HTN                                                                                           | 0.5         | 0.5           | 102 (46%)                    | 41 (18%)            | 80 (36%)                      |
| The Internet for HTN                                                                                                                     | 0.6         | 0.5           | 65 (29%)                     | 47 (21%)            | 111 (50%)                     |
| Electronic decision support (e.g. mobile phone applications or other electronic devices to assist with care and decision-making) for HTN | 0.5         | 0.5           | 105 (47%)                    | 28 (13%)            | 90 (40%)                      |

STROBE Statement—Checklist of items that should be included in reports of *cross-sectional studies*

|                              | Item No | Recommendation                                                                                                                                                                                               | Page No |
|------------------------------|---------|--------------------------------------------------------------------------------------------------------------------------------------------------------------------------------------------------------------|---------|
| <b>Title and abstract</b>    | 1       | (a) Indicate the study's design with a commonly used term in the title or the abstract                                                                                                                       | 1       |
|                              |         | (b) Provide in the abstract an informative and balanced summary of what was done and what was found                                                                                                          | 2       |
| <b>Introduction</b>          |         |                                                                                                                                                                                                              |         |
| Background/rationale         | 2       | Explain the scientific background and rationale for the investigation being reported                                                                                                                         | 4       |
| Objectives                   | 3       | State specific objectives, including any prespecified hypotheses                                                                                                                                             | 5       |
| <b>Methods</b>               |         |                                                                                                                                                                                                              |         |
| Study design                 | 4       | Present key elements of study design early in the paper                                                                                                                                                      | 4-5     |
| Setting                      | 5       | Describe the setting, locations, and relevant dates, including periods of recruitment, exposure, follow-up, and data collection                                                                              | 5       |
| Participants                 | 6       | (a) Give the eligibility criteria, and the sources and methods of selection of participants                                                                                                                  | 5-6     |
| Variables                    | 7       | Clearly define all outcomes, exposures, predictors, potential confounders, and effect modifiers. Give diagnostic criteria, if applicable                                                                     | 7-8     |
| Data sources/<br>measurement | 8*      | For each variable of interest, give sources of data and details of methods of assessment (measurement). Describe comparability of assessment methods if there is more than one group                         | 6-8     |
| Bias                         | 9       | Describe any efforts to address potential sources of bias                                                                                                                                                    | 5       |
| Study size                   | 10      | Explain how the study size was arrived at                                                                                                                                                                    | 5       |
| Quantitative variables       | 11      | Explain how quantitative variables were handled in the analyses. If applicable, describe which groupings were chosen and why                                                                                 | 7-8     |
| Statistical methods          | 12      | (a) Describe all statistical methods, including those used to control for confounding                                                                                                                        | 7-8     |
|                              |         | (b) Describe any methods used to examine subgroups and interactions                                                                                                                                          | 7-8     |
|                              |         | (c) Explain how missing data were addressed                                                                                                                                                                  | 7-8     |
|                              |         | (d) If applicable, describe analytical methods taking account of sampling strategy                                                                                                                           | n/a     |
|                              |         | (e) Describe any sensitivity analyses                                                                                                                                                                        | n/a     |
| <b>Results</b>               |         |                                                                                                                                                                                                              |         |
| Participants                 | 13*     | (a) Report numbers of individuals at each stage of study—eg numbers potentially eligible, examined for eligibility, confirmed eligible, included in the study, completing follow-up, and analysed            | 8       |
|                              |         | (b) Give reasons for non-participation at each stage                                                                                                                                                         | n/a     |
|                              |         | (c) Consider use of a flow diagram                                                                                                                                                                           | n/a     |
| Descriptive data             | 14*     | (a) Give characteristics of study participants (eg demographic, clinical, social) and information on exposures and potential confounders                                                                     | 8-9     |
|                              |         | (b) Indicate number of participants with missing data for each variable of interest                                                                                                                          | n/a     |
| Outcome data                 | 15*     | Report numbers of outcome events or summary measures                                                                                                                                                         | 9-11    |
| Main results                 | 16      | (a) Give unadjusted estimates and, if applicable, confounder-adjusted estimates and their precision (eg, 95% confidence interval). Make clear which confounders were adjusted for and why they were included |         |

|                          |    |                                                                                                                                                                            |       |
|--------------------------|----|----------------------------------------------------------------------------------------------------------------------------------------------------------------------------|-------|
|                          |    | (b) Report category boundaries when continuous variables were categorized                                                                                                  |       |
|                          |    | (c) If relevant, consider translating estimates of relative risk into absolute risk for a meaningful time period                                                           |       |
| Other analyses           | 17 | Report other analyses done—eg analyses of subgroups and interactions, and sensitivity analyses                                                                             | 9-11  |
| <b>Discussion</b>        |    |                                                                                                                                                                            |       |
| Key results              | 18 | Summarise key results with reference to study objectives                                                                                                                   | 11    |
| Limitations              | 19 | Discuss limitations of the study, taking into account sources of potential bias or imprecision. Discuss both direction and magnitude of any potential bias                 | 13    |
| Interpretation           | 20 | Give a cautious overall interpretation of results considering objectives, limitations, multiplicity of analyses, results from similar studies, and other relevant evidence | 13    |
| Generalisability         | 21 | Discuss the generalisability (external validity) of the study results                                                                                                      | 11-13 |
| <b>Other information</b> |    |                                                                                                                                                                            |       |
| Funding                  | 22 | Give the source of funding and the role of the funders for the present study and, if applicable, for the original study on which the present article is based              | 14    |

\*Give information separately for exposed and unexposed groups.

**Note:** An Explanation and Elaboration article discusses each checklist item and gives methodological background and published examples of transparent reporting. The STROBE checklist is best used in conjunction with this article (freely available on the Web sites of PLoS Medicine at <http://www.plosmedicine.org/>, Annals of Internal Medicine at <http://www.annals.org/>, and Epidemiology at <http://www.epidem.com/>). Information on the STROBE Initiative is available at [www.strobe-statement.org](http://www.strobe-statement.org).

# BMJ Open

## Exploring contextual factors influencing the implementation of evidence-based care for hypertension in Rwanda: A cross-sectional study using the COACH questionnaire

|                                 |                                                                                                                                                                                                                                                                                                                                                                                                                                                                                                                                                                                                                                                                                                                                                                                                                                                                                                                                                                                                                                           |
|---------------------------------|-------------------------------------------------------------------------------------------------------------------------------------------------------------------------------------------------------------------------------------------------------------------------------------------------------------------------------------------------------------------------------------------------------------------------------------------------------------------------------------------------------------------------------------------------------------------------------------------------------------------------------------------------------------------------------------------------------------------------------------------------------------------------------------------------------------------------------------------------------------------------------------------------------------------------------------------------------------------------------------------------------------------------------------------|
| Journal:                        | <i>BMJ Open</i>                                                                                                                                                                                                                                                                                                                                                                                                                                                                                                                                                                                                                                                                                                                                                                                                                                                                                                                                                                                                                           |
| Manuscript ID                   | bmjopen-2020-048425.R1                                                                                                                                                                                                                                                                                                                                                                                                                                                                                                                                                                                                                                                                                                                                                                                                                                                                                                                                                                                                                    |
| Article Type:                   | Original research                                                                                                                                                                                                                                                                                                                                                                                                                                                                                                                                                                                                                                                                                                                                                                                                                                                                                                                                                                                                                         |
| Date Submitted by the Author:   | 20-May-2021                                                                                                                                                                                                                                                                                                                                                                                                                                                                                                                                                                                                                                                                                                                                                                                                                                                                                                                                                                                                                               |
| Complete List of Authors:       | Baumann, Ana; Washington University in Saint Louis, Hooley, Cole; Brigham Young University<br>Goss, Charles W.; Washington University in St Louis<br>Mutabazi, Vincent; Regional Alliance for Sustainable Development<br>Brown, Angela L.; Washington University in St Louis School of Medicine<br>Schechtman, K; Washington University, Division of Biostatistics<br>Twagirumukiza, Marc; Regional Alliance for Sustainable Development; University of Rwanda<br>de las Fuentes, Lisa ; Washington University in Saint Louis<br>Reeds, Dominic; Washington University in St Louis School of Medicine<br>Williams, Makeda; National Heart Lung and Blood Institute<br>Mutimura, Eugene; Women's Equity in Access to Care and Treatment, Research and Professional Training<br>Bergström, Anna; Uppsala Universitet<br>Nishimwe, Aurore; Regional Alliance for Sustainable Development<br>Ingabire, Cecile; Regional Alliance for Sustainable Development<br>Davila-Roman, Victor G.; Washington University in St Louis School of Medicine |
| <b>Primary Subject Heading</b>: | Cardiovascular medicine                                                                                                                                                                                                                                                                                                                                                                                                                                                                                                                                                                                                                                                                                                                                                                                                                                                                                                                                                                                                                   |
| Secondary Subject Heading:      | Health services research                                                                                                                                                                                                                                                                                                                                                                                                                                                                                                                                                                                                                                                                                                                                                                                                                                                                                                                                                                                                                  |
| Keywords:                       | Hypertension < CARDIOLOGY, EDUCATION & TRAINING (see Medical Education & Training), Quality in health care < HEALTH SERVICES ADMINISTRATION & MANAGEMENT                                                                                                                                                                                                                                                                                                                                                                                                                                                                                                                                                                                                                                                                                                                                                                                                                                                                                  |
|                                 |                                                                                                                                                                                                                                                                                                                                                                                                                                                                                                                                                                                                                                                                                                                                                                                                                                                                                                                                                                                                                                           |

SCHOLARONE™  
Manuscripts

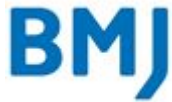

I, the Submitting Author has the right to grant and does grant on behalf of all authors of the Work (as defined in the below author licence), an exclusive licence and/or a non-exclusive licence for contributions from authors who are: i) UK Crown employees; ii) where BMJ has agreed a CC-BY licence shall apply, and/or iii) in accordance with the terms applicable for US Federal Government officers or employees acting as part of their official duties; on a worldwide, perpetual, irrevocable, royalty-free basis to BMJ Publishing Group Ltd ("BMJ") its licensees and where the relevant Journal is co-owned by BMJ to the co-owners of the Journal, to publish the Work in this journal and any other BMJ products and to exploit all rights, as set out in our [licence](#).

The Submitting Author accepts and understands that any supply made under these terms is made by BMJ to the Submitting Author unless you are acting as an employee on behalf of your employer or a postgraduate student of an affiliated institution which is paying any applicable article publishing charge ("APC") for Open Access articles. Where the Submitting Author wishes to make the Work available on an Open Access basis (and intends to pay the relevant APC), the terms of reuse of such Open Access shall be governed by a Creative Commons licence – details of these licences and which [Creative Commons](#) licence will apply to this Work are set out in our licence referred to above.

Other than as permitted in any relevant BMJ Author's Self Archiving Policies, I confirm this Work has not been accepted for publication elsewhere, is not being considered for publication elsewhere and does not duplicate material already published. I confirm all authors consent to publication of this Work and authorise the granting of this licence.



**Title:** Exploring contextual factors influencing the implementation of evidence-based care for hypertension in Rwanda: A cross-sectional study using the COACH questionnaire

Ana A. Baumann<sup>1</sup>,  
Cole Hooley<sup>2</sup>,  
Charles W. Goss<sup>3</sup>,  
Vincent Mutabazi<sup>4</sup>,  
Angela L. Brown<sup>5</sup>,  
Kenneth B. Schechtman<sup>3</sup>,  
Marc Twagirimukiza<sup>4,6</sup>,  
Lisa de las Fuentes<sup>3,5</sup>,  
Dominic N. Reeds<sup>7</sup>,  
Makeda Williams<sup>8</sup>,  
Eugene Mutimura<sup>4</sup>,  
Anna Bergström<sup>9</sup>,  
Aurore Nishimwe<sup>4</sup>,  
Cecile Ingabire<sup>4</sup>,  
Víctor G. Dávila-Román<sup>5</sup>

1. Washington University in St. Louis, Brown School of Social Work, St. Louis, MO, USA
2. Brigham Young University, Provo, UT, USA
3. Washington University in St. Louis, Division of Biostatistics, St. Louis, MO, USA
4. Regional Alliance for Sustainable Development, Rwanda
5. Washington University in St. Louis, School of Medicine, Cardiovascular Division, Department of Medicine, St. Louis, MO, USA
6. College of Medicine and Health Sciences, University of Rwanda, Kigali, Rwanda
7. Washington University in St. Louis, School of Medicine, Division of Endocrinology, Metabolism & Lipid Research, Department of Medicine, St. Louis, MO, USA
8. National Heart, Lung, and Blood Institute, Bethesda, MD, USA
9. Uppsala Global Health Research on Implementation and Sustainability (UGHRIS), Dept of Women's and Children's Health, Uppsala University, Sweden

Address for correspondence:

Víctor G. Dávila-Román, MD  
Professor of Medicine, Anesthesiology and Radiology  
Director, Cardiovascular Imaging and Clinical Research Core Laboratory  
Cardiovascular Division, Box 8086  
Washington University School of Medicine  
660 S. Euclid Ave.  
St. Louis, MO 63110-1093  
Email: [vdavila@wustl.edu](mailto:vdavila@wustl.edu)

**Disclaimer:** The views expressed in this manuscript are those of the authors and do not necessarily represent the views of the National Heart, Lung, and Blood Institute; the National Institutes of Health; or the U.S. Department of Health and Human Services.

## Abstract

**Importance:** Hypertension is the largest contributor to the Global Burden of Disease. In Rwanda, as in most low- and middle-income countries, an increasing prevalence of hypertension and its associated morbidity and mortality is causing major health care and economic impact. Understanding healthcare systems context in hypertension care is necessary.

**Objective:** To study the hypertension healthcare context as perceived by healthcare providers using the Context Assessment for Community Health (COACH) tool.

**Design:** A cross-sectional cohort responded to the COACH questionnaire and a survey about HTN training.

**Setting:** Three tertiary care hospitals in Rwanda.

**Participants:** Healthcare professionals (n=223).

**Primary Outcome(s) and Measure(s):** The COACH tool consists of 49 items with eight subscales: Resources, Community Engagement, Commitment to Work, Informal Payment, Leadership, Work Culture, Monitoring Services for Action (5-point Likert scale) and Sources of Knowledge (on a 0-1 scale). Four questions surveyed training on hypertension.

**Results:** Responders (n=223, 75% women; 56% aged 20-35 years) included nurses (n=142, 64%, midwives (n=42, 19%), primary care physicians (n=28, 13%) and physician specialists (n=11, 5%). The subscales Commitment to Work, Leadership, Work Culture and Informal Payment scored between 4.7 and 4.1, the Community Engagement, Monitoring Services for Action and Organizational Resources scored between 3.1 and 3.5. Sources of Knowledge had a mean score of 0.6±0.3. While 73% reported having attended a didactic hypertension seminar in the past year, only 28% had received long-term training, and 51% had <3 years experience working with

1  
2  
3 hypertension care delivery. The majority (99%) indicated a need for additional training in  
4  
5 hypertension care.  
6

7  
8 **Conclusions:** There is a need for increased and continuous training in Rwanda. Healthcare  
9  
10 responders stated a commitment to work and reported supportive leadership, while acknowledging  
11  
12 limited resources and no monitoring systems. The COACH tool provides contextual guidance to  
13  
14 develop training strategies prior to implementation of a sustainable hypertension care program.  
15  
16

17  
18  
19 **Key words:** Hypertension, Rwanda, contextual assessment, guidelines, education and training  
20  
21

#### 22 23 24 **Strengths and Limitations of the Study:**

- 25  
26 • A cross-sectional cohort of providers from three hospitals in Rwanda responded to the  
27  
28 Context Assessment for Community Health (COACH) tool and a survey examining  
29  
30 existing training in hypertension care.  
31  
32
- 33  
34 • Respondents shared a high commitment to work and positive leadership, while indicating  
35  
36 the need for more training in hypertension care and monitoring.  
37
- 38  
39 • Based on the COACH tool training, strategies are being co-developed to implement a  
40  
41 comprehensive and sustainable hypertension care program in Rwanda.  
42  
43

44  
45 **Funding statement:** This work was supported in part by National Institutes of Health (NIH)  
46  
47 National Heart, Lung, and Blood Institute (NHLBI) grants U24HL136790, D43TW10335,  
48  
49 3U01HL133994 and UL1TR00234.  
50

#### 51 52 **Background**

53  
54  
55  
56  
57  
58  
59  
60

1  
2  
3 Hypertension is the most common disease in the world affecting globally over 1.2 billion people,  
4  
5 is the largest contributor to the Global Burden of Disease, and is the most prevalent risk factor for  
6  
7 the development of cardiovascular disease (CVD).<sup>1-3</sup> The overall global prevalence of  
8  
9 hypertension exceeds 50% of adults older than 50 years, and in low- and middle-income countries  
10  
11 (LMICs) ranges from 32%-78%.<sup>4-7</sup> Rwanda, located in sub-Saharan Africa, is a LMIC with 12.4  
12  
13 million relatively young people (those <34 years of age represent 78% of the population), and with  
14  
15 a high population density.<sup>7,8</sup> Rwanda is undergoing an epidemiological transition with an  
16  
17 increasing co-existence of infectious diseases and non-communicable diseases (NCDs) including  
18  
19 hypertension.<sup>8,9</sup> Epidemiologic data from Rwanda estimates a high prevalence of both  
20  
21 hypertension and CVD, which together account for 36% of deaths.<sup>10</sup> The 2015 Rwanda NCDs risk  
22  
23 survey based on the World Health Organization (WHO) STEPS framework (STEPwise Approach  
24  
25 to Surveillance) reported an overall hypertension prevalence of 15% (95% confidence interval  
26  
27 [CI]: 13.8 to 16.3) for those aged 15 to 64 years and 39% (95% CI: 35.7 to 43.1) for those aged  
28  
29 55–64 years, with deaths attributable to hypertension at 18/100,000.<sup>11</sup> These data are consistent  
30  
31 with those of other sub-Saharan countries, reflecting the importance of hypertension as a public  
32  
33 health burden in Sub-Saharan Africa.<sup>12</sup>

34  
35 While evidence-based intervention (EBI) studies have shown that treatment and control of  
36  
37 hypertension decreases morbidity and mortality, barriers for the implementation of these  
38  
39 interventions have been found at all healthcare levels, including systems, providers, and patients.<sup>13</sup>  
40  
41 The application of dissemination and implementation (D&I) science allows for a rigorous and  
42  
43 systematic approach to develop implementation strategies and improve the uptake of effective  
44  
45 EBIs for hypertension care.<sup>14</sup>  
46  
47  
48  
49  
50  
51  
52  
53  
54  
55  
56  
57  
58  
59  
60

1  
2  
3 Selection of implementation strategies, that is, methods to implement these EBIs in usual care,  
4 should be based on frameworks and on an understanding of the context where the intervention will  
5 be implemented.<sup>15</sup> The Promoting Action on Research Implementation in Health Services  
6 (PARIHS) is a framework that outlines three core elements (evidence, context and facilitation) for  
7 successful EBI implementation<sup>14-15</sup>. Context, defined as “the environment or setting in which the  
8 proposed change is to be implemented” is comprised of three sub-elements: culture, leadership  
9 and evaluation, dimensions being evaluated in this study.<sup>14-15</sup> The Context Assessment for  
10 Community Health (COACH), a validated theory-based tool aimed at examining healthcare  
11 contexts in LMICs, is a 49-item survey based on the context dimension of the PARIHS framework  
12 and the interconnected building blocks of the World Health Organization.<sup>16</sup> The COACH tool was  
13 developed to identify barriers for EBI implementation, to guide planning and adaptation of the  
14 strategies to increase the uptake of the EBIs, and to link contextual characteristics to outcome  
15 indicators of healthcare interventions.<sup>16</sup> Due to its theoretical base and its acceptable reliability  
16 and validity among providers in a variety of LMICs including Vietnam, Bangladesh, Uganda,  
17 South Africa, and Nicaragua<sup>16,17</sup>, COACH was used in the present study to examine the context  
18 of hypertension care as reported by healthcare providers from three hospitals in Rwanda.

## 39 **Methods**

40  
41  
42 **Study setting.** The study was conducted at three hospitals (two district, one provincial) in Rwanda;  
43 to maintain the confidentiality of participants the hospitals are identified as A, B and C. The study  
44 was approved by the University of Rwanda CMHS Institutional Review Board and by the  
45 Washington University School of Medicine Institutional Review Board Committee.

46  
47  
48 **Participants.** Participants were healthcare providers working in the included hospitals. Lists of all  
49 medical professional staff (nursing, midwives, physicians) were provided by the hospital

1  
2  
3 administrations to the study team; from these lists, study participants were contacted to participate  
4  
5 in the study. All those who were contacted agreed to participate, all signed informed consent, and  
6  
7 subsequently underwent in-person interviews to complete the survey.  
8  
9

10 **Questions about provider training in hypertension.** A separate survey asked health care  
11  
12 providers four questions regarding training in hypertension care: i) have you received didactic or  
13  
14 school-based training on hypertension? (response options for first three questions: in the past year,  
15  
16 before the past year, never); ii) have you received a structured long-term (>1 month course)  
17  
18 training on hypertension?; iii) have you received on job training, in-service or supervision on the  
19  
20 management of hypertension?; and iv) do you feel there is need for additional training in the  
21  
22 management of hypertension? (response options: yes, no/not sure).  
23  
24  
25

26 **Questions about health care system context.** The COACH tool consists of 49 questions across  
27  
28 eight subscales. *Organizational Resources* refers to the availability of human capacity and  
29  
30 materials that allow an organization to implement an intervention successfully. *Community*  
31  
32 *Engagement* refers to mutual communication and activities that occur between community  
33  
34 members and the organization. *Monitoring* refers to the process of using locally derived data to  
35  
36 evaluate performance and plans to improve outcomes. *Sources of Knowledge* refers to the  
37  
38 availability and use of sources of facts, information, and skills acquired by providers through  
39  
40 experience or education in an organization that facilitate best practice. *Commitment to Work* refers  
41  
42 to an individual identification with and involvement in an organization. *Work Culture* refers to the  
43  
44 process of an organization, reflecting a shared set of values, ideas, concepts and rules of behavior  
45  
46 that allow the organization to function. *Leadership* refers to the actions of a person in the  
47  
48 organization who can influence change and excellence in practice, achieved through clarity and  
49  
50 engagement. *Informal Payment* refers to bribe and/or benefits given to an individual outside of the  
51  
52  
53  
54  
55  
56  
57  
58  
59  
60

1  
2  
3 officially accepted arrangements.<sup>16</sup> Respondents were asked to rate their level of agreement using  
4 a five-point Likert scale for all items, except for items in the *Sources of Knowledge* subscale where  
5 the scale is from 0 to 1, regarding the use of the hypertension guidelines within a specified time  
6 frame and the availability of different sources of knowledge.  
7  
8  
9

10  
11  
12 **Translation and adaptation of COACH tool.** The majority of healthcare workers in Rwanda do  
13 not routinely communicate in English. For this reason, the COACH tool was translated from  
14 English to Kinyarwanda (study participants' daily language), and subsequently back translated to  
15 English by two Rwandan bilingual experts in both English and Kinyarwanda, following the World  
16 Health Organization guidelines for translation of assessments<sup>18</sup> to ensure the accuracy of the  
17 translation. Items that needed further clarification after pilot testing were discussed with the tool  
18 developer and agreement on the translation was reached by consensus. Additionally, we adapted  
19 the questions to be specific in relation to hypertension care (e.g., "This facility is willing to use  
20 new healthcare practices such as guidelines and recommendations for HTN").  
21  
22  
23  
24  
25  
26  
27  
28  
29  
30  
31

32  
33 **Patient and Public Involvement:** The COACH questionnaire has been previously validated in  
34 LMICs and was modified by the research team to address the context of hypertension in Rwanda  
35 through our weekly calls. The Rwandan co-investigators had primary responsibility for the  
36 translation (English to Kinyarwanda) and back-translation of the COACH questionnaire and for  
37 development, recruitment and conduction of the study. Patients were not involved in the  
38 development, recruitment or conduction of the study. The results of this study has been shared  
39 with stakeholders in Rwanda through our yearly meetings. Additional dissemination with the  
40 ministry of Health, academic institutions, health care providers and others will occur once the  
41 manuscript is published.  
42  
43  
44  
45  
46  
47  
48  
49  
50  
51  
52  
53  
54  
55  
56  
57  
58  
59  
60

1  
2  
3 **Data collection.** Data were collected by in-person interviews, using structured questionnaires in  
4 paper and pencil format, and subsequently transferred in duplicate entry to Qualtrics by members  
5 of the research team. There were no missing values for any of the questions and any discrepancies  
6 in data entry were resolved. The survey was administered between May 27 through June 4, 2019.  
7  
8

9  
10  
11 **Analysis.** Demographics are reported as the total number of respondents and percentage in each  
12 group. Differences among hospitals were assessed using chi-square tests or Fisher's exact tests as  
13 appropriate. COACH dimensions are reported as means  $\pm$  standard deviation, for each hospital and  
14 combined across all hospitals. Cronbach's  $\alpha$ , a coefficient of reliability, was used to determine  
15 internal consistency of the test items and the average inter-correlation between the items in each  
16 dimension. Scoring of sources of knowledge dimension ranged from 0 (not available,  
17 never/rarely), 0.5 (occasionally), to 1 (frequently/always); scoring for the other subscales ranged  
18 from 1 (strongly disagree) to 5 (strongly agree). The first six items in the informal payment  
19 dimension were reverse-scored so that the directional interpretation was similar to the other  
20 dimensions.  
21  
22  
23  
24  
25  
26  
27  
28  
29  
30  
31  
32  
33

34  
35 A one-way analysis of variance (ANOVA) was used to test for differences in mean dimension  
36 scores among the three hospitals. All analyses were conducted using SAS, 9.4 (SAS Institute Inc.,  
37 Cary, NC, USA) and  $P$ -values  $< 0.05$  were considered significant.  
38  
39  
40  
41

## 42 **Results**

43  
44 The total number of respondents (n=223) included nurses, midwives, primary care physicians and  
45 specialty physicians, with approximately similar representation obtained from all three hospitals  
46 (Table 1). The majority of respondents were female, relatively young, had nursing or midwife  
47 degrees and had limited experience working in hypertension care. The hospitals differed in terms  
48  
49  
50  
51  
52  
53  
54  
55  
56  
57  
58  
59  
60



1  
2  
3 of number of years of experience of the health care providers working in hypertension care  
4  
5 (p=0.003).  
6

7  
8 **Training in hypertension.** Results of the perspectives of health care providers regarding training  
9  
10 in hypertension care show that nearly all respondents (99%) have participated in a didactic or  
11  
12 school-based training on hypertension at some point during their training and/or career (either in  
13  
14 the past year or before the past year, Table 2). Almost half (44%) of respondents stated having  
15  
16 participated in long-term training (i.e., >1 month course) on hypertension (either in the past year  
17  
18 or before the past year), and a significant majority (72%) had received on the job training, in-  
19  
20 service or supervision on the management of hypertension at some time in their career (either in  
21  
22 the past year or before the past year).  
23  
24

25  
26 The level of training in hypertension varied by hospital, showing statistically significant  
27  
28 differences in having received didactic or school-based training on hypertension in the past year  
29  
30 and before the past year (p<0.001 for both); in having received long-term training (> 1 month)  
31  
32 before the past year (p=0.014), and having received on job training, in service or supervision on  
33  
34 the management of hypertension in the past year (p=0.008) and never (p=0.002). Finally, almost  
35  
36 all respondents reported the need for additional training in hypertension (99%) without statistically  
37  
38 significant differences between hospitals.  
39  
40

41  
42 **Internal reliability of COACH tool.** Overall, the COACH tool showed very good to high internal  
43  
44 consistency (Cronbach's  $\alpha$  range: 0.57-0.92; Table 3) with all but three dimensions exceeding the  
45  
46 accepted standard for satisfactory internal reliability of >0.70 for new scales. The highest  
47  
48 Cronbach's  $\alpha$  estimates (0.92) was for *Leadership* and the lowest (0.57) was for *Informal payment*.  
49  
50 After removal of two items from the *Informal Payments* subscale (i.e., "Efforts are made to stop  
51  
52 clients from providing informal payment to get appropriate healthcare services in hypertension"  
53  
54  
55  
56  
57

1  
2  
3 and “Efforts are made to stop health workers from asking clients for informal payment for  
4 hypertension”), Cronbach’s  $\alpha$  increased to 0.74. Similarly, for the *Work Culture* subscale, removal  
5 of one item (i.e., “This facility helps me to improve and develop my skills in hypertension”)  
6 resulted in a Cronbach’s alpha increase from 0.69 to 0.75. Finally, for *Sources of Knowledge*,  
7 removal of any of the constituent items did not improve Cronbach’s alpha from 0.67.  
8  
9

10  
11  
12  
13  
14 **COACH subscales.** Table 4 shows the mean and standard deviations for the scales across  
15 hospitals. There were significant differences in the mean scores across hospitals between the  
16 *Organizational Resources*, *Monitoring Services*, *Sources of Knowledge*, *Work Culture*,  
17 *Leadership*, and *Informal Payment* subscales.  
18  
19

20  
21  
22  
23  
24 The *Organizational Resources* received a mean score of 3.1, suggesting that respondents were  
25 overall neutral about this scale (Tables 4 and 5). The majority of respondents agreed with only  
26 three of eleven dimensions, including “facility has access to transport and fuel that are needed to  
27 provide healthcare services for HTN” (50% agreed), “facility has access to the communication  
28 tools that are needed to provide healthcare services for HTN (54%), and the “facility has enough  
29 disposable medical equipment to provide healthcare services for HTN” (83% agreed). For the  
30 remaining eight dimensions, greater than 50% of respondents were either neutral or disagreed with  
31 the dimensions dealing with *Human Resources*, *Space*, *Medicine and Equipment* and *Financing*,  
32 suggesting that there is room for improvement in these areas.  
33  
34  
35  
36  
37  
38  
39

40  
41  
42  
43  
44 The *Community Engagement* received a mean score of 3.5, suggesting that respondents were  
45 slightly more favorable than neutral about the commitment of their hospitals towards their  
46 community (Table 5). In fact, four of the five dimensions had more than half of the respondents  
47 agreeing with community engagement in hypertension care, with only one dimension, “in this  
48  
49  
50  
51  
52  
53  
54  
55  
56  
57  
58  
59  
60

1  
2  
3 facility, we encourage other organizations to contribute to improving HTN in the community”  
4  
5 showing a majority being either neutral (36%) or disapproving (27%).  
6

7  
8 The *Monitoring Services for Action* received a mean score of 3.2, suggesting that respondents were  
9  
10 neutral about the use of locally derived data to evaluate the performance and plans to improve  
11  
12 hypertension care. Of the five dimensions, only one, “this facility regularly compares its work with  
13  
14 national or other guidelines for HTN” (61%) showed agreement by more than half of the  
15  
16 respondents.  
17

18  
19 The *Commitment to Work* received a mean score of 4.2, suggesting that respondents are committed  
20  
21 to their hospitals. All three dimensions showed approval by a significant majority (ranging from  
22  
23 70% to 94%).  
24

25  
26 The *Leadership* subscale received a mean score of 4.1, suggesting that respondents are supportive  
27  
28 of their leadership. All six dimensions had more than half of the respondents (81% to 92%)  
29  
30 agreeing with high remarks for their leadership.  
31

32  
33 The *Informal Payment* received a mean score of 4.7, suggesting that respondents do not have  
34  
35 concerns with informal payments, nepotism or accountability. In fact, in six of eight dimensions,  
36  
37 more than half of the respondents (83% to 98%) indicated no concerns with these issues. However,  
38  
39 in the dimension of *Accountability* the low mean score of 2.8 is also reflected by a majority of  
40  
41 combined neutral and disagree responses regarding “efforts are made to stop clients from providing  
42  
43 informal payment to get appropriate healthcare services in HTN” (22% and 44%, respectively),  
44  
45 and “efforts are made to stop health workers from asking clients for informal payment for HTN”  
46  
47 (18% and 44%, respectively).  
48  
49

50  
51 The *Sources of Knowledge* received a mean score of 0.6 (scale range: range 0-1), with discordant  
52  
53 result in three of five dimensions: while a majority agreed that they have access to information  
54  
55

1  
2  
3 regarding hypertension guidelines, stating agreement for “clinical practice guidelines for HTN”  
4 (61%), “printed material for work with HTN” (54%), and use of “internet for HTN” (50%), the  
5 majority responded with either occasionally or never/rarely responses regarding “in-service  
6 training/ workshops/courses for HTN” (18% and 46%, respectively) and “electronic decision  
7 support for HTN” (13% and 47%, respectively).  
8  
9

## 14 **Discussion**

15  
16  
17 The purpose of this study was to examine the contextual factors influencing hypertension care at  
18 three provincial/district hospitals in Rwanda, ascertained after completion of the COACH tool, a  
19 survey validated for use in LMIC, and a questionnaire about training in hypertension. The main  
20 findings of the study indicate an overwhelming agreement from the majority of respondents for  
21 increased and/or continuous training in hypertension care, as ascertained in the Training  
22 Questionnaire and in the COACH *Knowledge* and *Organizational Resources* subscales.  
23  
24

25  
26 Our research team has been collaborating with healthcare providers from these hospitals for several  
27 years prior to survey, which may explain the high scores in the *Work Culture* and *Leadership*  
28 subscales. While healthcare respondents in general stated a commitment to work and reported  
29 supportive leadership, the lower scores in the *Resources* and *Monitoring Services* scales indicate  
30 challenges and opportunities for growth in these areas. In other words, even with such strong  
31 leadership in support of hypertension care, only about half of the respondents agreed with items  
32 that stated that the hospital had enough workers with the proper training and skills for HTN care.  
33  
34 Additionally, the low scores on the *Monitoring* subscale indicate that respondents believe that the  
35 hospital could improve evaluations of personnel performance with the purpose of improving  
36 hypertension outcomes.  
37  
38  
39  
40  
41  
42  
43  
44  
45  
46  
47  
48  
49  
50  
51  
52  
53  
54  
55  
56  
57  
58  
59  
60

1  
2  
3 These findings provide us with contextual guidance for development of training strategies prior to  
4 implementation of a comprehensive and sustainable hypertension care program in Rwanda. That  
5 is, based on the data, the training program should focus on providing further knowledge and  
6 understanding of the hypertension guidelines, and on developing strategies to increase human  
7 capacity and monitoring of skills around hypertension care in these hospitals. The results also  
8 indicate that we need to develop implementation strategies to support hypertension care in these  
9 hospitals and to think about how to increase skills on hypertension care and establish a monitoring  
10 system to support guideline adherence. The findings of this study reflect a larger historical context  
11 in Rwanda, with a shortage of trained physicians trained, especially after the 1996 Genocide.<sup>19</sup>  
12 Accordingly, recently there has been a national movement for nurse-led task sharing of HTN  
13 care.<sup>19,20</sup>

14  
15 The findings of the COACH tool will guide our next steps in developing capacity building  
16 strategies and supporting the hospitals in establishing monitoring systems for HTN care. However,  
17 the *Informal Payment* and *Sources of Knowledge* subscales exhibited low Cronbach's  $\alpha$  internal  
18 reliability scores. Other studies have found similar challenges with these subscales indicating that  
19 additional work is needed in these subscales.<sup>21</sup> Regarding the subscale *Work Culture*, it is unclear  
20 why the item "This facility helps me to improve and develop my skills in hypertension" was  
21 challenging in our study. Further cognitive interview with the Kinyarwanda translation of the tool  
22 are needed to understand challenges with this item.

23  
24 There were significant differences in the mean scores across hospitals between the *Organizational*  
25 *Resources*, *Monitoring Services*, *Sources of Knowledge*, *Work Culture*, *Leadership*, and *Informal*  
26 *Payment* subscales, indicating the tool's ability to identify differences in these contextual factors.  
27  
28 Assessment of the context of three hospitals provides guidance for our next training, selection and

1  
2  
3 adaptation of implementation strategies to improve hypertension care in three hospitals in Rwanda.  
4  
5 The overall good validity of the COACH tool indicates that it is comprehensible in Kinyarwanda  
6  
7 and able to capture differences across settings.  
8  
9

10 The Context Assessment for Community Health (COACH) tool was originally developed in five  
11  
12 LMICs (Bangladesh, Vietnam, Uganda, South Africa, Nicaragua), and more recently applied in  
13  
14 Mozambique to assess healthcare context and its potential use for integration of evidence-based  
15  
16 interventions and to develop their implementation in clinical practice in LMICs<sup>16,17</sup>. The internal  
17  
18 consistency of the COACH tool in a sample of providers in Rwanda, a different country from  
19  
20 where the tool was developed and tested, show its utility to measure contextual dimensions in  
21  
22 another LMIC. As this study is part of long-term capacity building efforts to strengthening  
23  
24 dissemination and implementation science and hypertension science in Rwanda, our team is  
25  
26 currently supporting the development of several studies, led by investigators in Rwanda, to  
27  
28 examine implementation strategies to support the hypertension care in these hospitals.  
29  
30  
31

32  
33 **Limitations of the study.** While we gathered important information for our next steps in terms of  
34  
35 context and the need for additional training in hypertension care, we did not examine the specific  
36  
37 areas where the respondents need training in terms of hypertension care (e.g., epidemiology,  
38  
39 diagnosis, treatment). To further examine the hypertension care in these hospitals, we will gather  
40  
41 qualitative data through focus groups with our stakeholders. Additionally, while between hospitals  
42  
43 analyses of the scores were done, our team is unable to report these to avoid breach of  
44  
45 confidentiality. This information has been shared with hospital leadership in a confidential manner  
46  
47 so they can incorporate and support hypertension training in strategic planning. Finally, the internal  
48  
49 consistency of the COACH subscales after removal of the items was satisfactory, but further  
50  
51  
52  
53  
54  
55  
56  
57  
58  
59  
60

1  
2  
3 studies need to examine the challenges in the *Informal Payment* subscale and its low Cronbach  
4  
5 alpha, also reported in other studies.<sup>17</sup>  
6

### 7 **Conclusions.**

8  
9  
10 Contextual measures related to hypertension care in Rwanda shows a need for increased and/or  
11  
12 continuous training. Healthcare responders stated a general commitment to work and reported  
13  
14 supportive leadership while acknowledging challenges with resources and monitoring services.  
15  
16 COACH tool provides contextual guidance for development of training strategies prior to  
17  
18 implementation of a comprehensive and sustainable hypertension care program in Rwanda.  
19  
20  
21  
22  
23

24 **Acknowledgements.** We acknowledge all providers who responded to the survey. This work was  
25  
26 supported in part by NHLBI grants U24HL136790, D43TW10335, 3U01HL133994 and  
27  
28 UL1TR00234.  
29

30  
31 **Author contributions.** Ana A. Baumann (AAB), Cole Hooley (CH), Charles W. Goss (CWG),  
32  
33 Vincent Mutabazi (VM), Angela L. Brown (ALB), Kenneth Schechtman (KBS), Marc  
34  
35 Twagirumukiza (MT), Lisa de las Fuentes (LdIF), Dominic N. Reeds (DNR), Makeda Williams  
36  
37 (MW), Eugene Mutimura (EM), Anna Bergström (AB), Aurore Nishimwe (AN), Cecile Ingabire  
38  
39 (CI), and Victor G. Davila-Roman (VGD-R) conceptualized the study. AAB, CH, and VM  
40  
41 organized the survey. VM led COACH tool translation and back translation and was responsible  
42  
43 for data collection. CH was responsible for data management. CWG was responsible for data  
44  
45 analysis. AAB, CH, CWG and VGD-R drafted initial version of manuscript. All co-authors read,  
46  
47 contributed to and approved the final manuscript.  
48  
49  
50

51 **Competing interests statement:** The authors declare no competing interest.

52  
53  
54 **Disclosure statement.** No potential conflict of interest was reported by any of the authors.  
55  
56  
57  
58  
59  
60

**Ethics and consent.** This study was approved by University of Rwanda-CMHS Institutional Review Board (approval notice: 099/CMSH IRB 2019) and by Washington University School of Medicine Institutional Review Board Committee (IRB # 201807048). Participants were informed of the potential risks and benefits of the study and signed an informed consent form in Kinyarwanda language before enrolment in the study. All participant data were anonymized to optimize privacy and confidentiality of responses.

**Data availability.** No additional data is available. Data are available upon reasonable request to the corresponding author.

## References

1. GBD 2017 Risk Factor Collaborators. Global, regional, and national comparative risk assessment of 84 behavioural, environmental and occupational, and metabolic risks or clusters of risks for 195 countries and territories, 1990-2017: a systematic analysis for the Global Burden of Disease Study 2017. *Lancet*. 2018;392:1923-1994.
2. Roth GA, Mensah GA, Johnson CO, et al. Global Burden of Cardiovascular Diseases and Risk Factors, 1990–2019: Update From the GBD 2019 Study. *J Am Coll Cardiol*. 2020;76(25):2982-3021. doi:10.1016/j.jacc.2020.11.010
3. Unger Thomas, Borghi Claudio, Charchar Fadi, et al. 2020 International Society of Hypertension Global Hypertension Practice Guidelines. *Hypertension*. 2020;75(6):1334-1357. doi:10.1161/HYPERTENSIONAHA.120.15026
4. WHO | Raised blood pressure. WHO. Accessed July 23, 2020. [https://www.who.int/gho/ncd/risk\\_factors/blood\\_pressure\\_prevalence\\_text/en/](https://www.who.int/gho/ncd/risk_factors/blood_pressure_prevalence_text/en/)
5. Lloyd-Sherlock P, Beard J, Minicuci N, Ebrahim S, Chatterji S. Hypertension among older adults in low- and middle-income countries: prevalence, awareness and control. *Int J Epidemiol*. 2014;43(1):116-128. doi:10.1093/ije/dyt215
6. Forouzanfar MH, Liu P, Roth GA, et al. Global Burden of Hypertension and Systolic Blood Pressure of at Least 110 to 115 mm Hg, 1990-2015. *JAMA*. 2017;317(2):165-182. doi:10.1001/jama.2016.19043
7. Nahimana M, Nyandwi A, Muhimpundu MA, et al. A population-based national estimate of the prevalence and risk factors associated with hypertension in Rwanda: implications for prevention and control. *BMC Public Health*. 2017;18. doi:10.1186/s12889-017-4536-9



- 1  
2  
3 8. Rwanda Ministry of Health. Ministry of Health. Accessed July 23, 2020.  
4 <https://moh.gov.rw/index.php?id=188>  
5
- 6  
7 9. Twagirumukiza M, De Bacquer D, Kips JG, de Backer G, Stichele RV, Van Bortel LM.  
8 Current and projected prevalence of arterial hypertension in sub-Saharan Africa by sex, age  
9 and habitat: an estimate from population studies. *J Hypertens*. 2011;29(7):1243-1252.  
10 doi:10.1097/HJH.0b013e328346995d  
11
- 12  
13 10. Zhou B, Bentham J, Cesare MD, et al. Worldwide trends in blood pressure from 1975 to  
14 2015: a pooled analysis of 1479 population-based measurement studies with 19·1 million  
15 participants. *The Lancet*. 2017;389(10064):37-55. doi:10.1016/S0140-6736(16)31919-5  
16
- 17  
18 11. World Health Organization. World Health Rankings. World Life Expectancy. Published  
19 2016. Accessed July 23, 2020. [https://www.worldlifeexpectancy.com/world-health-](https://www.worldlifeexpectancy.com/world-health-rankings)  
20 [rankings](https://www.worldlifeexpectancy.com/world-health-rankings)
- 21  
22 12. de Ramirez SS, Enquobahrie DA, Nyadzi G, et al. Prevalence and correlates of hypertension:  
23 a cross-sectional study among rural populations in sub-Saharan Africa. *J Hum Hypertens*.  
24 2010;24(12):786-795. doi:10.1038/jhh.2010.14  
25
- 26  
27 13. Baumann A, Hooley C, Mutabazi V, et al. Training implementation research in Rwanda:  
28 Evaluation, challenges and lessons learned. In: *AcademyHealth*; 2019. Accessed February  
29 2, 2020.  
30 <https://academyhealth.confex.com/academyhealth/2019di/meetingapp.cgi/Paper/35206>
- 31  
32 14. Kirchner JE, Smith JL, Powell BJ, Waltz TJ, Proctor EK. Getting a clinical innovation into  
33 practice: An introduction to implementation strategies. *Psychiatry Res*. 2020;283:112467.  
34 doi:10.1016/j.psychres.2019.06.042  
35
- 36  
37 15. Powell BJ, Beidas RS, Lewis CC, et al. Methods to Improve the Selection and Tailoring of  
38 Implementation Strategies. *J Behav Health Serv Res*. 2017;44(2):177-194.  
39 doi:10.1007/s11414-015-9475-6  
40
- 41  
42 16. Bergström A, Skeen S, Duc DM, et al. Health system context and implementation of  
43 evidence-based practices—development and validation of the Context Assessment for  
44 Community Health (COACH) tool for low- and middle-income settings. *Implement Sci*.  
45 2015;10(1):120. doi:10.1186/s13012-015-0305-2  
46
- 47  
48 17. Duc DM, Bergström A, Eriksson L, Selling K, Thi Thu Ha B, Wallin L. Response process  
49 and test–retest reliability of the Context Assessment for Community Health tool in  
50 Vietnam. *Glob Health Action*. 2016;9(1):31572. doi:10.3402/gha.v9.31572  
51
- 52  
53 18. World Health Organization. WHO | Process of translation and adaptation of instruments.  
54 WHO. Accessed April 5, 2021.  
55 [https://www.who.int/substance\\_abuse/research\\_tools/translation/en/](https://www.who.int/substance_abuse/research_tools/translation/en/)  
56
- 57  
58 19. Niyonsenga SP, Park PH, Ngoga G, et al. Implementation outcomes of national  
59 decentralization of integrated outpatient services for severe non-communicable diseases to  
60

1  
2  
3 district hospitals in Rwanda. *Trop Med Int Health*. 2021;online(n/a).  
4 doi:<https://doi.org/10.1111/tmi.13593>  
5

- 6  
7 20. Tapela NM, Bukhman G, Ngoga G, et al. Treatment of non-communicable disease in rural  
8 resource-constrained settings: a comprehensive, integrated, nurse-led care model at public  
9 facilities in Rwanda. *Lancet Glob Health*. 2015;3:S36. doi:10.1016/S2214-109X(15)70155-  
10 5  
11  
12 21. Mocumbi S, McKee K, Munguambe K, et al. Ready to deliver maternal and newborn care?  
13 Health providers' perceptions of their work context in rural Mozambique. *Glob Health*  
14 *Action*. 2018;11(1):1532631. doi:10.1080/16549716.2018.1532631  
15  
16  
17  
18  
19  
20  
21  
22  
23  
24  
25  
26  
27  
28  
29  
30  
31  
32  
33  
34  
35  
36  
37  
38  
39  
40  
41  
42  
43  
44  
45  
46  
47  
48  
49  
50  
51  
52  
53  
54  
55  
56  
57  
58  
59  
60

**Table 1.** Participant demographics reported as n (%).

| Variable                                | Group                  | All<br>(N = 223) | Hospital A<br>(N=74) | Hospital B<br>(N=70) | Hospital C<br>(N=79) | p value |
|-----------------------------------------|------------------------|------------------|----------------------|----------------------|----------------------|---------|
| Age                                     | 20-35 years            | 125 (56%)        | 40 (54%)             | 40 (57%)             | 45 (57%)             | 0.914   |
|                                         | ≥36 years              | 98 (44%)         | 34 (46%)             | 30 (43%)             | 34 (43%)             |         |
| Gender                                  | Female                 | 168 (75%)        | 51 (69%)             | 53 (76%)             | 64 (81%)             | 0.2     |
| Education                               | Nurse                  | 142 (64%)        | 46 (62%)             | 47 (67%)             | 49 (62%)             | 0.811   |
|                                         | Midwife                | 42 (19%)         | 17 (23%)             | 11 (16%)             | 14 (18%)             |         |
|                                         | Primary care physician | 28 (13%)         | 9 (12%)              | 9 (13%)              | 10 (13%)             |         |
|                                         | Physician specialist   | 11 (5%)          | 2 (3%)               | 3 (4%)               | 6 (8%)               |         |
| Experience working in hypertension care | 0-3 years              | 114 (51%)        | 32 (43%)             | 28 (40%)             | 54 (68%)             | 0.003   |
|                                         | 4-9 years              | 64 (29%)         | 27 (37%)             | 22 (31%)             | 15 (19%)             |         |
|                                         | ≥10 years              | 45 (20%)         | 15 (20%)             | 20 (29%)             | 10 (13%)             |         |

**Table 2.** Participant hypertension training history reported as number and % of those responding “Yes”.

| Variable                                                                                      | All<br>(N=223) | Hospital A<br>(N=74) | Hospital B<br>(N=70) | Hospital C<br>(N=79) | p value |
|-----------------------------------------------------------------------------------------------|----------------|----------------------|----------------------|----------------------|---------|
| <b>Have you received didactic or school-based training on HTN?</b>                            |                |                      |                      |                      |         |
| A. In the past year                                                                           | 72 (32%)       | 34(46%)              | 24 (34%)             | 14 (18%)             | <.001   |
| B. Before the past year                                                                       | 162 (73%)      | 42 (57%)             | 51 (73%)             | 69 (87%)             | <.001   |
| C. Never                                                                                      | 3 (1%)         | 2 (3%)               | 1 (1%)               | 0                    | 0.311   |
| <b>Have you received a structured long-term (&gt;1 month course) training on HTN?</b>         |                |                      |                      |                      |         |
| A. In the past year                                                                           | 41 (18%)       | 18 (24%)             | 9 (13%)              | 14 (18%)             | 0.203   |
| B. Before the past year                                                                       | 58 (26%)       | 28 (38%)             | 16 (23%)             | 14 (18%)             | 0.014   |
| C. Never                                                                                      | 160 (72%)      | 45 (61%)             | 54 (77%)             | 61 (77%)             | 0.038   |
| <b>Have you received on job training, in-service or supervision on the management of HTN?</b> |                |                      |                      |                      |         |
| A. In the past year                                                                           | 81 (36%)       | 33 (45%)             | 30 (43%)             | 18 (23%)             | 0.008   |
| B. Before the past year                                                                       | 79 (36%)       | 31 (42%)             | 26 (37%)             | 22 (28%)             | 0.18    |
| C. Never                                                                                      | 109 (49%)      | 29 (39%)             | 29 (41%)             | 51 (65%)             | 0.002   |
| <b>Do you feel there is need for additional training in the management of HTN?</b>            |                |                      |                      |                      |         |
| Yes                                                                                           | 220 (99%)      | 73 (99%)             | 70 (100%)            | 77 (97%)             | 0.776   |

**Table 3.** Cronbach alpha estimates for the different COACH dimensions.

| <b>Dimension</b>                                      | <b>Items</b> | <b>Score range</b> | <b>Cronbach <math>\alpha</math></b> |
|-------------------------------------------------------|--------------|--------------------|-------------------------------------|
| Organizational resources                              | 11           | 1-5                | 0.83                                |
| Community engagement                                  | 5            | 1-5                | 0.80                                |
| Monitoring services for action                        | 5            | 1-5                | 0.74                                |
| Commitment to work                                    | 3            | 1-5                | 0.77                                |
| Work culture                                          | 6            | 1-5                | 0.69                                |
| Work culture, with questions removed <sup>a</sup>     | 5            | 1-5                | 0.75                                |
| Leadership                                            | 6            | 1-5                | 0.92                                |
| Informal payment                                      | 8            | 1-5                | 0.57                                |
| Informal payment, with questions removed <sup>b</sup> | 6            | 1-5                | 0.74                                |
| Sources of knowledge                                  | 5            | 0-1                | 0.67                                |

Note: a: item: item “This facility helps me to improve and develop my skills in hypertension” removed; b: items “Efforts are made to stop clients from providing informal payment to get appropriate healthcare services in hypertension” and “Efforts are made to stop health workers from asking clients for informal payment for hypertension” were removed.

**Table 4.** Overall mean  $\pm$  standard deviation and by hospital for the COACH subscales.

| Dimensions                            | All<br>(N=223)                | Hospital<br>A<br>(N=74)       | Hospital<br>B<br>(N=70)       | Hospital<br>C<br>(N=79)       | p value          |
|---------------------------------------|-------------------------------|-------------------------------|-------------------------------|-------------------------------|------------------|
| <b>Organizational resources</b>       | <b>3.1<math>\pm</math>0.6</b> | <b>3.3<math>\pm</math>0.8</b> | <b>2.9<math>\pm</math>0.5</b> | <b>3.1<math>\pm</math>0.5</b> | <b>&lt;0.001</b> |
| Human Resources                       | 2.6 $\pm$ 1.0                 | 3.2 $\pm$ 1.1                 | 2.4 $\pm$ 0.9                 | 2.3 $\pm$ 0.8                 | <0.001           |
| Space                                 | 3.0 $\pm$ 1.1                 | 3.2 $\pm$ 1.2                 | 2.7 $\pm$ 1.1                 | 3.0 $\pm$ 1.1                 | 0.032            |
| Communication and transport           | 3.3 $\pm$ 1.0                 | 3.3 $\pm$ 1.1                 | 3.2 $\pm$ 1.0                 | 3.4 $\pm$ 0.8                 | 0.699            |
| Financing                             | 2.9 $\pm$ 0.7                 | 3.1 $\pm$ 0.8                 | 2.7 $\pm$ 0.6                 | 2.9 $\pm$ 0.5                 | <0.001           |
| Medicines and equipment               | 3.3 $\pm$ 0.8                 | 3.4 $\pm$ 0.9                 | 3.0 $\pm$ 0.7                 | 3.5 $\pm$ 0.7                 | <0.001           |
| <b>Community engagement</b>           | <b>3.5<math>\pm</math>0.7</b> | <b>3.5<math>\pm</math>0.8</b> | <b>3.4<math>\pm</math>0.7</b> | <b>3.6<math>\pm</math>0.5</b> | <b>0.118</b>     |
| <b>Monitoring services for action</b> | <b>3.2<math>\pm</math>0.6</b> | <b>3.3<math>\pm</math>0.8</b> | <b>3.0<math>\pm</math>0.6</b> | <b>3.2<math>\pm</math>0.5</b> | <b>0.001</b>     |
| <b>Commitment to work</b>             | <b>4.2<math>\pm</math>0.7</b> | <b>4.3<math>\pm</math>0.6</b> | <b>4.2<math>\pm</math>0.7</b> | <b>4.1<math>\pm</math>0.8</b> | <b>0.155</b>     |
| <b>Work culture</b>                   | <b>4.1<math>\pm</math>0.5</b> | <b>4.0<math>\pm</math>0.7</b> | <b>4.0<math>\pm</math>0.5</b> | <b>4.3<math>\pm</math>0.4</b> | <b>0.002</b>     |
| Culture of learning and change        | 3.8 $\pm$ 0.6                 | 3.8 $\pm$ 0.7                 | 3.8 $\pm$ 0.7                 | 3.7 $\pm$ 0.5                 | 0.768            |
| Culture of responsibility             | 4.1 $\pm$ 0.6                 | 4.0 $\pm$ 0.8                 | 4.0 $\pm$ 0.5                 | 4.4 $\pm$ 0.4                 | <0.001           |
| <b>Leadership</b>                     | <b>4.1<math>\pm</math>0.7</b> | <b>4.1<math>\pm</math>0.8</b> | <b>4.3<math>\pm</math>0.5</b> | <b>3.9<math>\pm</math>0.7</b> | <b>0.01</b>      |
| <b>Informal payment</b>               | <b>4.7<math>\pm</math>0.5</b> | <b>4.5<math>\pm</math>0.6</b> | <b>4.7<math>\pm</math>0.4</b> | <b>4.8<math>\pm</math>0.3</b> | <b>0.003</b>     |
| Accountability                        | 2.8 $\pm$ 1.5                 | 2.7 $\pm$ 1.5                 | 3.5 $\pm$ 1.3                 | 2.3 $\pm$ 1.3                 | <0.001           |
| Informal payment*                     | 4.7 $\pm$ 0.5                 | 4.6 $\pm$ 0.6                 | 4.8 $\pm$ 0.4                 | 4.8 $\pm$ 0.3                 | 0.002            |
| Nepotism*                             | 4.6 $\pm$ 0.6                 | 4.5 $\pm$ 0.7                 | 4.6 $\pm$ 0.6                 | 4.7 $\pm$ 0.6                 | 0.087            |
| <b>Sources of knowledge†</b>          | <b>0.6<math>\pm</math>0.3</b> | <b>0.6<math>\pm</math>0.3</b> | <b>0.5<math>\pm</math>0.3</b> | <b>0.7<math>\pm</math>0.3</b> | <b>0.003</b>     |

All values represent mean  $\pm$  standard deviation. Bolded items indicate COACH subscales; those below the subscales indicate the dimensions within the subscales.

†Score range for Sources of Knowledge is: 0-1; for all other subscales the score range is: 1-5.

\*Items on informal payment and Nepotism were reverse-scored.

Table 5. Descriptive values of items and dimensions of the COACH tool in Rwanda (N = 223)

| Scaled Dimensions/Items                                                                                                                | Mean | Median | Disagree   | Neutral   | Agree     |
|----------------------------------------------------------------------------------------------------------------------------------------|------|--------|------------|-----------|-----------|
| <b>Organizational resources</b>                                                                                                        | 3.1  | 3.0    | -          | -         | -         |
| <b>Human resources</b>                                                                                                                 | 2.6  | 2.5    | -          | -         | -         |
| This facility has enough workers with the right training and skills to do everything that needs to be done for HTN                     | 2.7  | 2.0    | 121 (54%)  | 43 (19%)  | 59 (27%)  |
| This facility has enough workers with the right training and skills to do their job in the best possible way for HTN                   | 2.6  | 2.0    | 123 (55%)  | 41 (18%)  | 59 (27%)  |
| <b>Space</b>                                                                                                                           | 3.0  | 3.0    | -          | -         | -         |
| This facility has enough space to provide healthcare services for HTN                                                                  | 3.0  | 3.0    | 96 (43%)   | 29 (13%)  | 98 (44%)  |
| <b>Communication and transport</b>                                                                                                     | 3.3  | 3.5    | -          | -         | -         |
| This facility has access to the transport and fuel that are needed to provide healthcare services for HTN                              | 3.3  | 4.0    | 60 (27%)   | 51 (23%)  | 112 (50%) |
| This facility has access to the communication tools (e.g. telephones or radios) that are needed to provide healthcare services for HTN | 3.3  | 4.0    | 65 (29%)   | 37 (17%)  | 121 (54%) |
| <b>Financing</b>                                                                                                                       | 2.9  | 3.0    | -          | -         | -         |
| This facility receives money according to a budget for HTN                                                                             | 2.9  | 3.0    | 42 (19%)   | 153 (69%) | 28 (13%)  |
| This facility has money that we can decide how to use for HTN                                                                          | 2.9  | 3.0    | 52 (23%)   | 140 (63%) | 31 (14%)  |
| <b>Medicines and equipment</b>                                                                                                         | 3.3  | 3.5    | -          | -         | -         |
| This facility has enough medicine to provide healthcare services for HTN                                                               | 3.1  | 3.0    | 81 (36%)   | 39 (18%)  | 103 (46%) |
| This facility has enough functional equipment to provide healthcare services for HTN                                                   | 3.1  | 3.0    | 80 (35.9%) | 38 (17%)  | 105 (47%) |
| This facility has enough disposable medical equipment, such as syringes, gloves and needles to provide healthcare services for HTN     | 4.0  | 4.0    | 24 (11%)   | 15 (7%)   | 184 (83%) |
| If the workload increases, the facility can get additional resources such as medicine and equipment for HTN                            | 3.1  | 3.0    | 59 (27%)   | 84 (38%)  | 80 (36%)  |
| <b>Community engagement</b>                                                                                                            | 3.5  | 3.6    | -          | -         | -         |

|                                                                                                                                     |     |     |           |           |           |
|-------------------------------------------------------------------------------------------------------------------------------------|-----|-----|-----------|-----------|-----------|
| In this facility, we ask community members what they think about the healthcare services that we provide for HTN                    | 3.3 | 4.0 | 46 (21%)  | 63 (28%)  | 114 (51%) |
| In this facility, we listen to what community members think about the healthcare services we provide for HTN                        | 3.7 | 4.0 | 30 (14%)  | 41 (18%)  | 152 (68%) |
| In this facility, we have meetings with community members to discuss health matters regarding HTN                                   | 3.6 | 4.0 | 30 (14%)  | 48 (22%)  | 145 (65%) |
| In this facility, we encourage community members to contribute to improving HTN in the community                                    | 3.7 | 4.0 | 29 (13%)  | 33 (15%)  | 161 (72%) |
| In this facility, we encourage other organizations to contribute to improving HTN in the community                                  | 3.3 | 3.0 | 44 (20%)  | 81 (36%)  | 98 (44%)  |
| <b>Monitoring services for action</b>                                                                                               | 3.2 | 3.2 | -         | -         | -         |
| I receive regular updates about the facility's performance on HTN based on information/data collected from our facility             | 2.7 | 3.0 | 110 (49%) | 51 (23%)  | 62 (28%)  |
| This facility discusses information/data from our facility on HTN in a regular, formal way, such as in regularly scheduled meetings | 3.2 | 3.0 | 60 (27%)  | 73 (33%)  | 90 (41%)  |
| This facility regularly uses facility information/data to make plans for improving its healthcare services for HTN                  | 3.1 | 3.0 | 41 (18%)  | 108 (48%) | 74 (33%)  |
| This facility regularly monitors its work by comparing it with the facility's action plans for HTN                                  | 3.2 | 3.0 | 30 (14%)  | 117 (53%) | 76 (34%)  |
| This facility regularly compares its work with national or other guidelines for HTN                                                 | 3.6 | 4.0 | 19 (9%)   | 68 (31%)  | 136 (61%) |
| <b>Commitment to work</b>                                                                                                           | 4.2 | 4.3 | -         | -         | -         |
| I am proud to work in this facility                                                                                                 | 4.0 | 4.0 | 16 (7%)   | 24 (11%)  | 183 (82%) |
| I am satisfied to work in this facility                                                                                             | 3.9 | 4.0 | 24 (11%)  | 23 (10%)  | 176 (79%) |
| I feel encouraged to do my very best at work                                                                                        | 4.6 | 5.0 | 6 (3%)    | 8 (4%)    | 209 (94%) |
| <b>Work culture</b>                                                                                                                 | 4.1 | 4.2 | -         | -         | -         |
| <b><i>Culture of learning and change</i></b>                                                                                        | 3.8 | 3.7 | -         | -         | -         |
| This facility is willing to use new healthcare practices such as guidelines and recommendations for HTN                             | 3.9 | 4.0 | 8 (4%)    | 45 (20%)  | 170 (76%) |
| This facility helps me to improve and develop my skills in HTN                                                                      | 3.1 | 3.0 | 87 (39%)  | 37 (17%)  | 99 (44%)  |
| I am encouraged to seek new information on healthcare practices for HTN                                                             | 4.4 | 4.0 | 7 (3%)    | 13 (6%)   | 203 (91%) |
| <b><i>Culture of responsibility</i></b>                                                                                             | 4.1 | 4.0 | -         | -         | -         |



|    |                                                                            |     |     |          |          |           |
|----|----------------------------------------------------------------------------|-----|-----|----------|----------|-----------|
| 1  |                                                                            |     |     |          |          |           |
| 2  |                                                                            |     |     |          |          |           |
| 3  | This facility works for the good of the clients and puts their needs first | 3.8 | 4.0 | 17 (8%)  | 51 (23%) | 155 (70%) |
| 4  | in treatment of HTN                                                        |     |     |          |          |           |
| 5  | Members of the facility feel personally responsible for improving          | 4.2 | 4.0 | 3 (1%)   | 34 (15%) | 186 (83%) |
| 6  | healthcare services for HTN                                                |     |     |          |          |           |
| 7  | Members of the facility approach clients with HTN with respect             | 4.4 | 4.0 | 3 (1%)   | 10 (5%)  | 210 (94%) |
| 8  | <b>Leadership</b>                                                          | 4.1 | 4.0 | -        | -        | -         |
| 9  | I trust the facility leader                                                | 4.2 | 4.0 | 9 (4%)   | 11 (5%)  | 203 (91%) |
| 10 | The leader handles stressful situations calmly                             | 4.0 | 4.0 | 13 (6%)  | 26 (12%) | 184 (83%) |
| 11 | The leader actively listens, acknowledges, and then responds to            | 4.0 | 4.0 | 14 (6%)  | 22 (10%) | 187 (84%) |
| 12 | requests and concerns                                                      |     |     |          |          |           |
| 13 | The leader effectively resolves any conflicts that arise                   | 4.1 | 4.0 | 9 (4%)   | 16 (7%)  | 198 (89%) |
| 14 | The leader encourages the introduction of new ideas and practices          | 4.2 | 4.0 | 6 (3%)   | 13 (6%)  | 204 (92%) |
| 15 | The leader makes things happen                                             | 4.0 | 4.0 | 11 (5%)  | 32 (14%) | 180 (81%) |
| 16 | <b>Informal payment</b>                                                    | 4.7 | 4.8 | -        | -        | -         |
| 17 | <i>Informal payment</i>                                                    | 4.7 | 5.0 | -        | -        | -         |
| 18 | Clients must always give informal payment to health workers to             | 4.9 | 5.0 | 1 (0.4%) | 3 (1%)   | 219 (98%) |
| 19 | access healthcare services for HTN                                         |     |     |          |          |           |
| 20 | Clients are treated more quickly if they make informal payments to         | 4.9 | 5.0 | 3 (1%)   | 5 (2%)   | 215 (96%) |
| 21 | health workers for HTN                                                     |     |     |          |          |           |
| 22 | Medicines or equipment for HTN that should be available for free to        | 4.6 | 5.0 | 5 (2%)   | 24 (11%) | 194 (87%) |
| 23 | clients have been sold in this facility                                    |     |     |          |          |           |
| 24 | Health workers are sometimes absent from work earning money at             | 4.5 | 5.0 | 5 (2%)   | 34 (15%) | 184 (83%) |
| 25 | other places                                                               |     |     |          |          |           |
| 26 | <b>Nepotism</b>                                                            | 4.6 | 5.0 | -        | -        | -         |
| 27 | Health workers in this facility give healthcare services for HTN to        | 4.7 | 5.0 | 4 (2%)   | 10 (5%)  | 209 (94%) |
| 28 | friends and family first                                                   |     |     |          |          |           |
| 29 | Health workers in this facility give jobs or other benefits to friends     | 4.5 | 5.0 | 10 (5%)  | 28 (13%) | 185 (83%) |
| 30 | and family first                                                           |     |     |          |          |           |
| 31 | <b>Accountability</b>                                                      | 2.8 | 3.0 | -        | -        | -         |
| 32 | Efforts are made to stop clients from providing informal payment to        | 2.8 | 3.0 | 99 (44%) | 49 (22%) | 75 (34%)  |
| 33 | get appropriate healthcare services in HTN                                 |     |     |          |          |           |
| 34 | Efforts are made to stop health workers from asking clients for            | 2.8 | 3.0 | 97 (44%) | 40 (18%) | 86 (39%)  |
| 35 | informal payment for HTN                                                   |     |     |          |          |           |
| 36 |                                                                            |     |     |          |          |           |
| 37 |                                                                            |     |     |          |          |           |
| 38 |                                                                            |     |     |          |          |           |
| 39 |                                                                            |     |     |          |          |           |
| 40 |                                                                            |     |     |          |          |           |
| 41 |                                                                            |     |     |          |          |           |
| 42 |                                                                            |     |     |          |          |           |
| 43 |                                                                            |     |     |          |          |           |
| 44 |                                                                            |     |     |          |          |           |
| 45 |                                                                            |     |     |          |          |           |
| 46 |                                                                            |     |     |          |          |           |
| 47 |                                                                            |     |     |          |          |           |

1  
2  
3  
4  
5  
6  
7  
8  
9  
10  
11  
12  
13  
14  
15  
16  
17  
18  
19  
20  
21  
22  
23  
24  
25  
26  
27  
28  
29  
30  
31  
32  
33  
34  
35  
36  
37  
38  
39  
40  
41  
42  
43  
44  
45  
46  
47

| <b>Non-scaled dimension/items</b>                                                                                                        | <b>Mean</b> | <b>Median</b> | <b>NA, never, rarely</b> | <b>Occasionally</b> | <b>Frequently, always</b> |
|------------------------------------------------------------------------------------------------------------------------------------------|-------------|---------------|--------------------------|---------------------|---------------------------|
| <b>Sources of Knowledge</b>                                                                                                              | 0.6         | 0.6           | -                        | -                   | -                         |
| Clinical practice guidelines for HTN                                                                                                     | 0.7         | 1.0           | 52 (23%)                 | 35 (16%)            | 136 (61%)                 |
| Other printed material for work (e.g. textbooks, journals) with HTN                                                                      | 0.6         | 1.0           | 58 (26%)                 | 45 (20%)            | 120 (54%)                 |
| In-service training/ workshops/courses for HTN                                                                                           | 0.5         | 0.5           | 102 (46%)                | 41 (18%)            | 80 (36%)                  |
| The Internet for HTN                                                                                                                     | 0.6         | 0.5           | 65 (29%)                 | 47 (21%)            | 111 (50%)                 |
| Electronic decision support (e.g. mobile phone applications or other electronic devices to assist with care and decision-making) for HTN | 0.5         | 0.5           | 105 (47%)                | 28 (13%)            | 90 (40%)                  |

STROBE Statement—Checklist of items that should be included in reports of *cross-sectional studies*

|                              | Item No | Recommendation                                                                                                                                                                                               | Page No |
|------------------------------|---------|--------------------------------------------------------------------------------------------------------------------------------------------------------------------------------------------------------------|---------|
| <b>Title and abstract</b>    | 1       | (a) Indicate the study's design with a commonly used term in the title or the abstract                                                                                                                       | 1       |
|                              |         | (b) Provide in the abstract an informative and balanced summary of what was done and what was found                                                                                                          | 2       |
| <b>Introduction</b>          |         |                                                                                                                                                                                                              |         |
| Background/rationale         | 2       | Explain the scientific background and rationale for the investigation being reported                                                                                                                         | 4       |
| Objectives                   | 3       | State specific objectives, including any prespecified hypotheses                                                                                                                                             | 5       |
| <b>Methods</b>               |         |                                                                                                                                                                                                              |         |
| Study design                 | 4       | Present key elements of study design early in the paper                                                                                                                                                      | 4-5     |
| Setting                      | 5       | Describe the setting, locations, and relevant dates, including periods of recruitment, exposure, follow-up, and data collection                                                                              | 5       |
| Participants                 | 6       | (a) Give the eligibility criteria, and the sources and methods of selection of participants                                                                                                                  | 5-6     |
| Variables                    | 7       | Clearly define all outcomes, exposures, predictors, potential confounders, and effect modifiers. Give diagnostic criteria, if applicable                                                                     | 7-8     |
| Data sources/<br>measurement | 8*      | For each variable of interest, give sources of data and details of methods of assessment (measurement). Describe comparability of assessment methods if there is more than one group                         | 6-8     |
| Bias                         | 9       | Describe any efforts to address potential sources of bias                                                                                                                                                    | 5       |
| Study size                   | 10      | Explain how the study size was arrived at                                                                                                                                                                    | 5       |
| Quantitative variables       | 11      | Explain how quantitative variables were handled in the analyses. If applicable, describe which groupings were chosen and why                                                                                 | 7-8     |
| Statistical methods          | 12      | (a) Describe all statistical methods, including those used to control for confounding                                                                                                                        | 7-8     |
|                              |         | (b) Describe any methods used to examine subgroups and interactions                                                                                                                                          | 7-8     |
|                              |         | (c) Explain how missing data were addressed                                                                                                                                                                  | 7-8     |
|                              |         | (d) If applicable, describe analytical methods taking account of sampling strategy                                                                                                                           | n/a     |
|                              |         | (e) Describe any sensitivity analyses                                                                                                                                                                        | n/a     |
| <b>Results</b>               |         |                                                                                                                                                                                                              |         |
| Participants                 | 13*     | (a) Report numbers of individuals at each stage of study—eg numbers potentially eligible, examined for eligibility, confirmed eligible, included in the study, completing follow-up, and analysed            | 8       |
|                              |         | (b) Give reasons for non-participation at each stage                                                                                                                                                         | n/a     |
|                              |         | (c) Consider use of a flow diagram                                                                                                                                                                           | n/a     |
| Descriptive data             | 14*     | (a) Give characteristics of study participants (eg demographic, clinical, social) and information on exposures and potential confounders                                                                     | 8-9     |
|                              |         | (b) Indicate number of participants with missing data for each variable of interest                                                                                                                          | n/a     |
| Outcome data                 | 15*     | Report numbers of outcome events or summary measures                                                                                                                                                         | 9-11    |
| Main results                 | 16      | (a) Give unadjusted estimates and, if applicable, confounder-adjusted estimates and their precision (eg, 95% confidence interval). Make clear which confounders were adjusted for and why they were included |         |

1  
2  
3  
4  
5  
6  
7  
8  
9  
10  
11  
12  
13  
14  
15  
16  
17  
18  
19  
20  
21  
22  
23  
24  
25  
26  
27  
28  
29  
30  
31  
32  
33  
34  
35  
36  
37  
38  
39  
40  
41  
42  
43  
44  
45  
46  
47  
48  
49  
50  
51  
52  
53  
54  
55  
56  
57  
58  
59  
60

|                          |    |                                                                                                                                                                            |       |
|--------------------------|----|----------------------------------------------------------------------------------------------------------------------------------------------------------------------------|-------|
|                          |    | (b) Report category boundaries when continuous variables were categorized                                                                                                  |       |
|                          |    | (c) If relevant, consider translating estimates of relative risk into absolute risk for a meaningful time period                                                           |       |
| Other analyses           | 17 | Report other analyses done—eg analyses of subgroups and interactions, and sensitivity analyses                                                                             | 9-11  |
| <b>Discussion</b>        |    |                                                                                                                                                                            |       |
| Key results              | 18 | Summarise key results with reference to study objectives                                                                                                                   | 11    |
| Limitations              | 19 | Discuss limitations of the study, taking into account sources of potential bias or imprecision. Discuss both direction and magnitude of any potential bias                 | 13    |
| Interpretation           | 20 | Give a cautious overall interpretation of results considering objectives, limitations, multiplicity of analyses, results from similar studies, and other relevant evidence | 13    |
| Generalisability         | 21 | Discuss the generalisability (external validity) of the study results                                                                                                      | 11-13 |
| <b>Other information</b> |    |                                                                                                                                                                            |       |
| Funding                  | 22 | Give the source of funding and the role of the funders for the present study and, if applicable, for the original study on which the present article is based              | 14    |

\*Give information separately for exposed and unexposed groups.

**Note:** An Explanation and Elaboration article discusses each checklist item and gives methodological background and published examples of transparent reporting. The STROBE checklist is best used in conjunction with this article (freely available on the Web sites of PLoS Medicine at <http://www.plosmedicine.org/>, Annals of Internal Medicine at <http://www.annals.org/>, and Epidemiology at <http://www.epidem.com/>). Information on the STROBE Initiative is available at [www.strobe-statement.org](http://www.strobe-statement.org).
